# Supplementary material
Source: publisher site journal article supplement (https://static.cambridge.org/content/id/urn:cambridge.org:id:article:S1368980019002179/resource/name/S1368980019002179supp001.pdf)
Supplement: Supplementary file 1 [file S1368980019002179supp001.pdf]

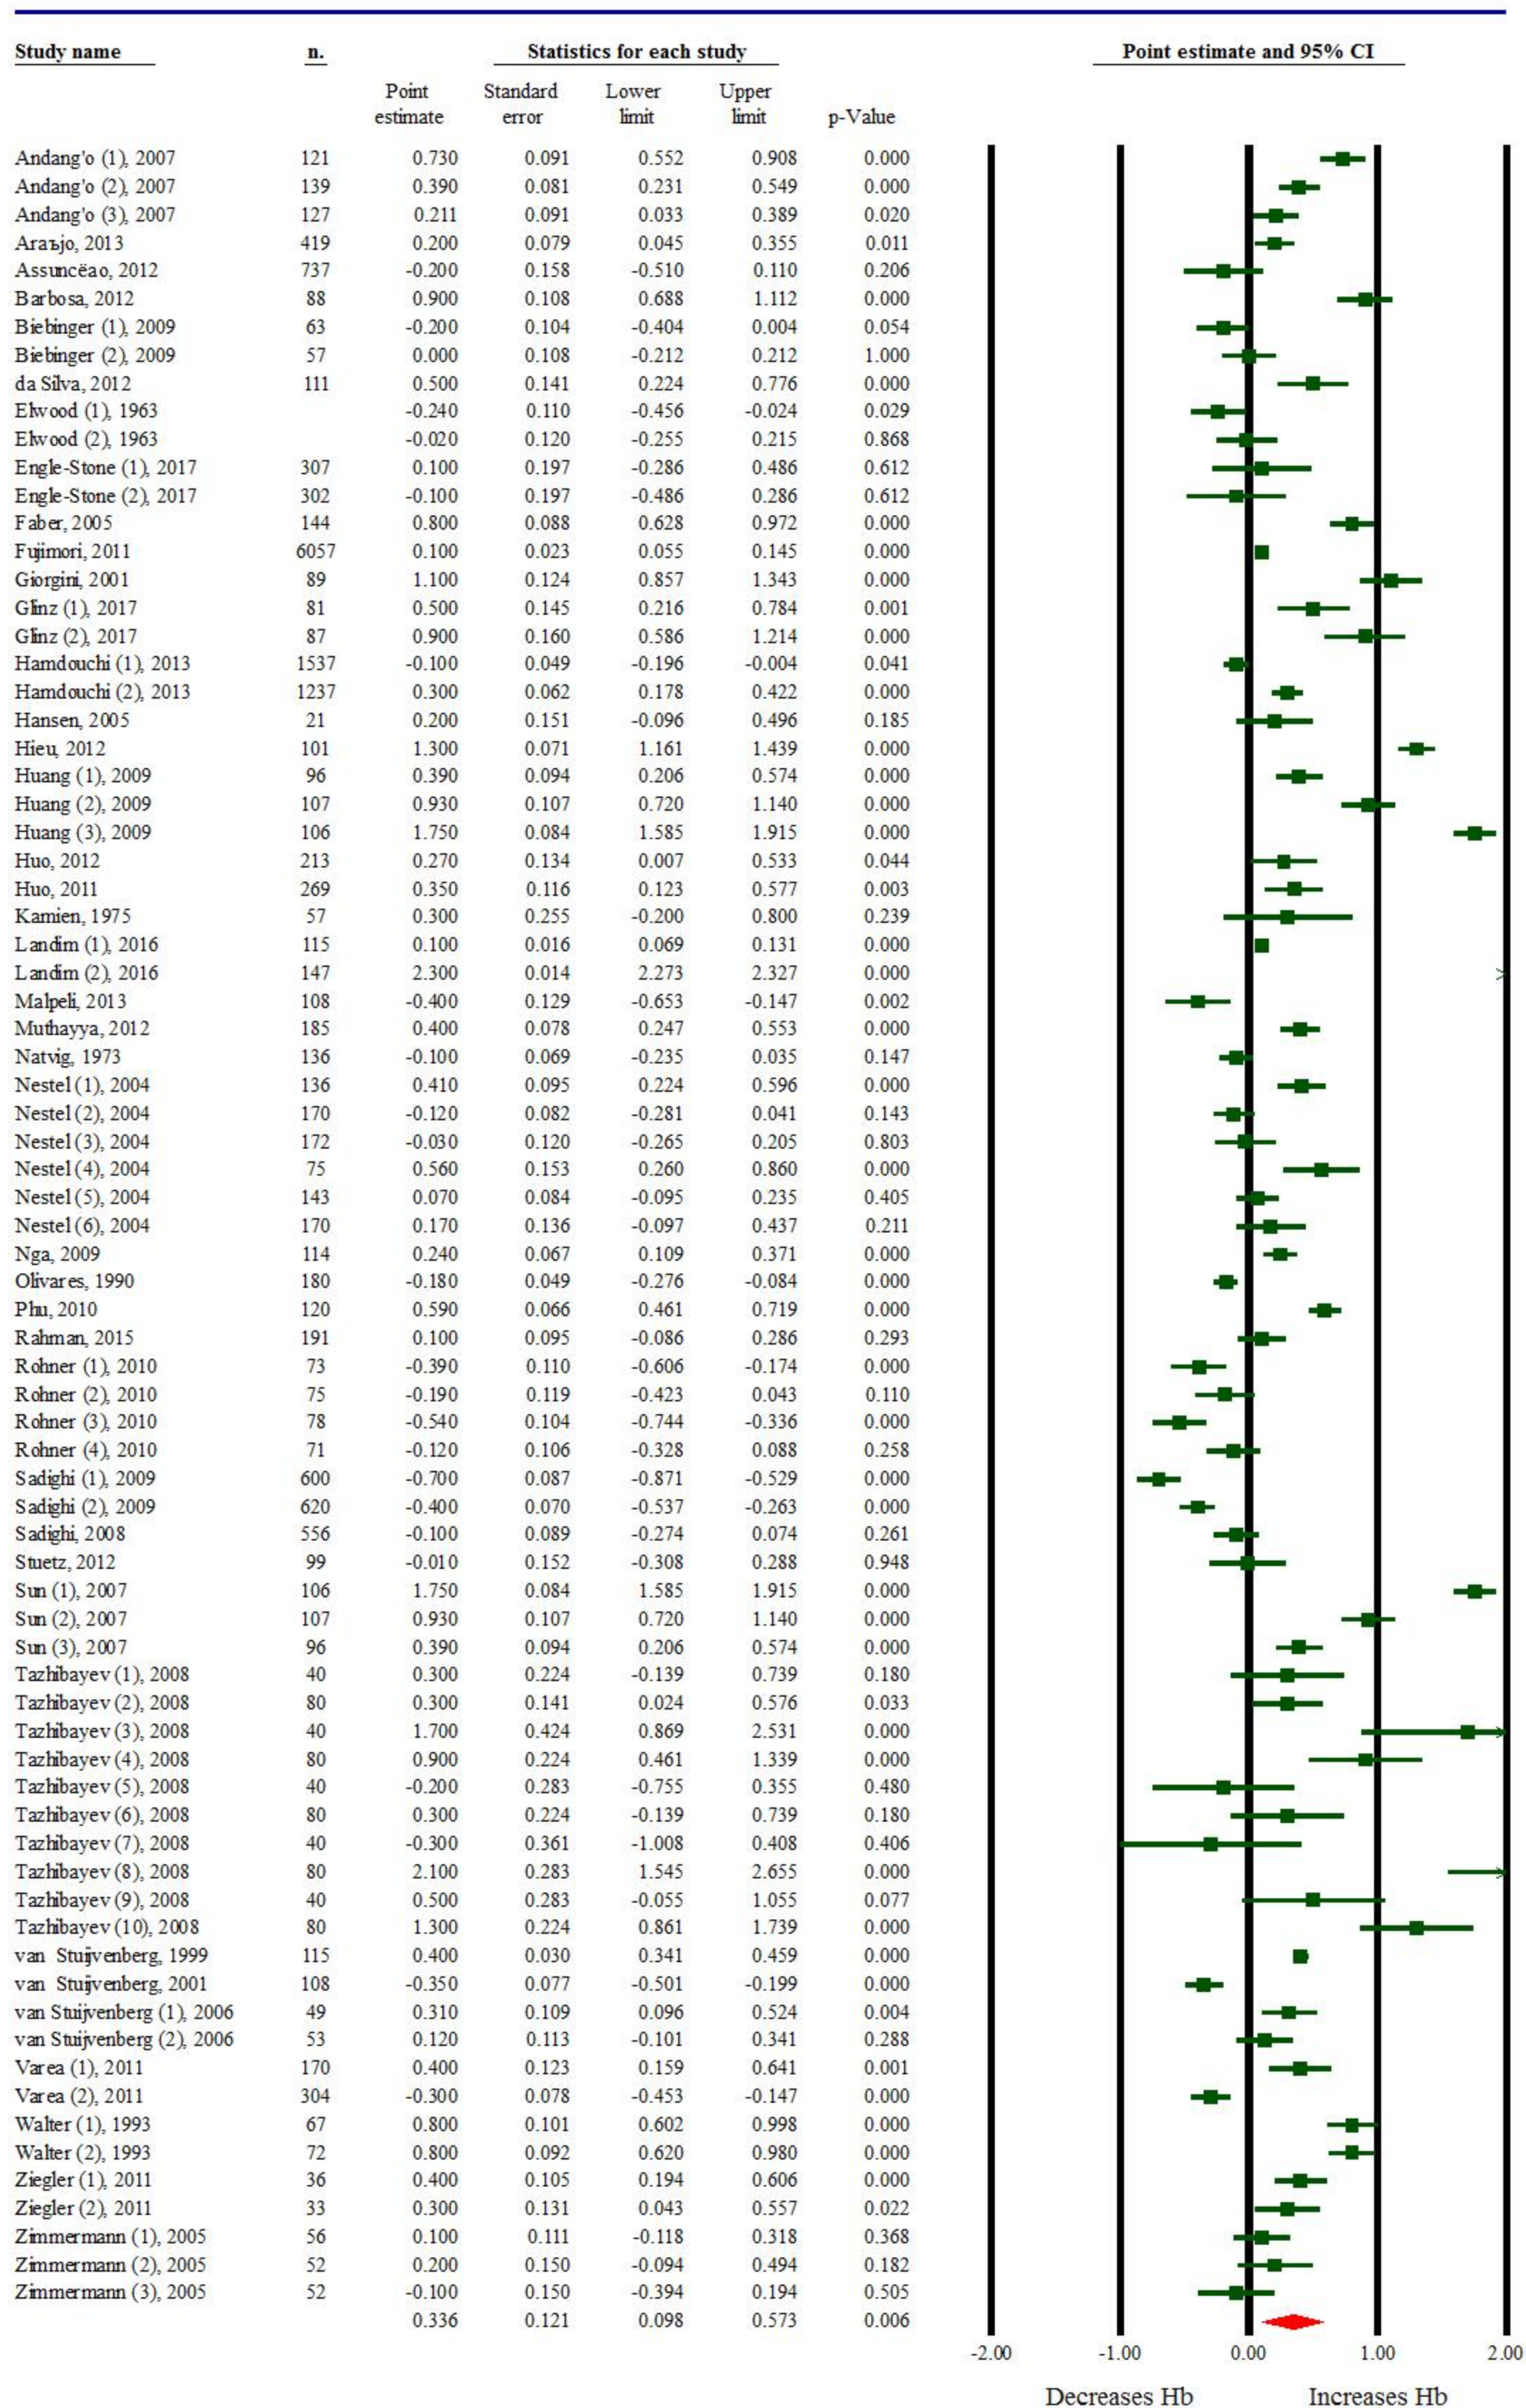

Fig. S1 Forest plot: effect of iron-fortified flour on mean hemoglobin (g/dL), before-after studies

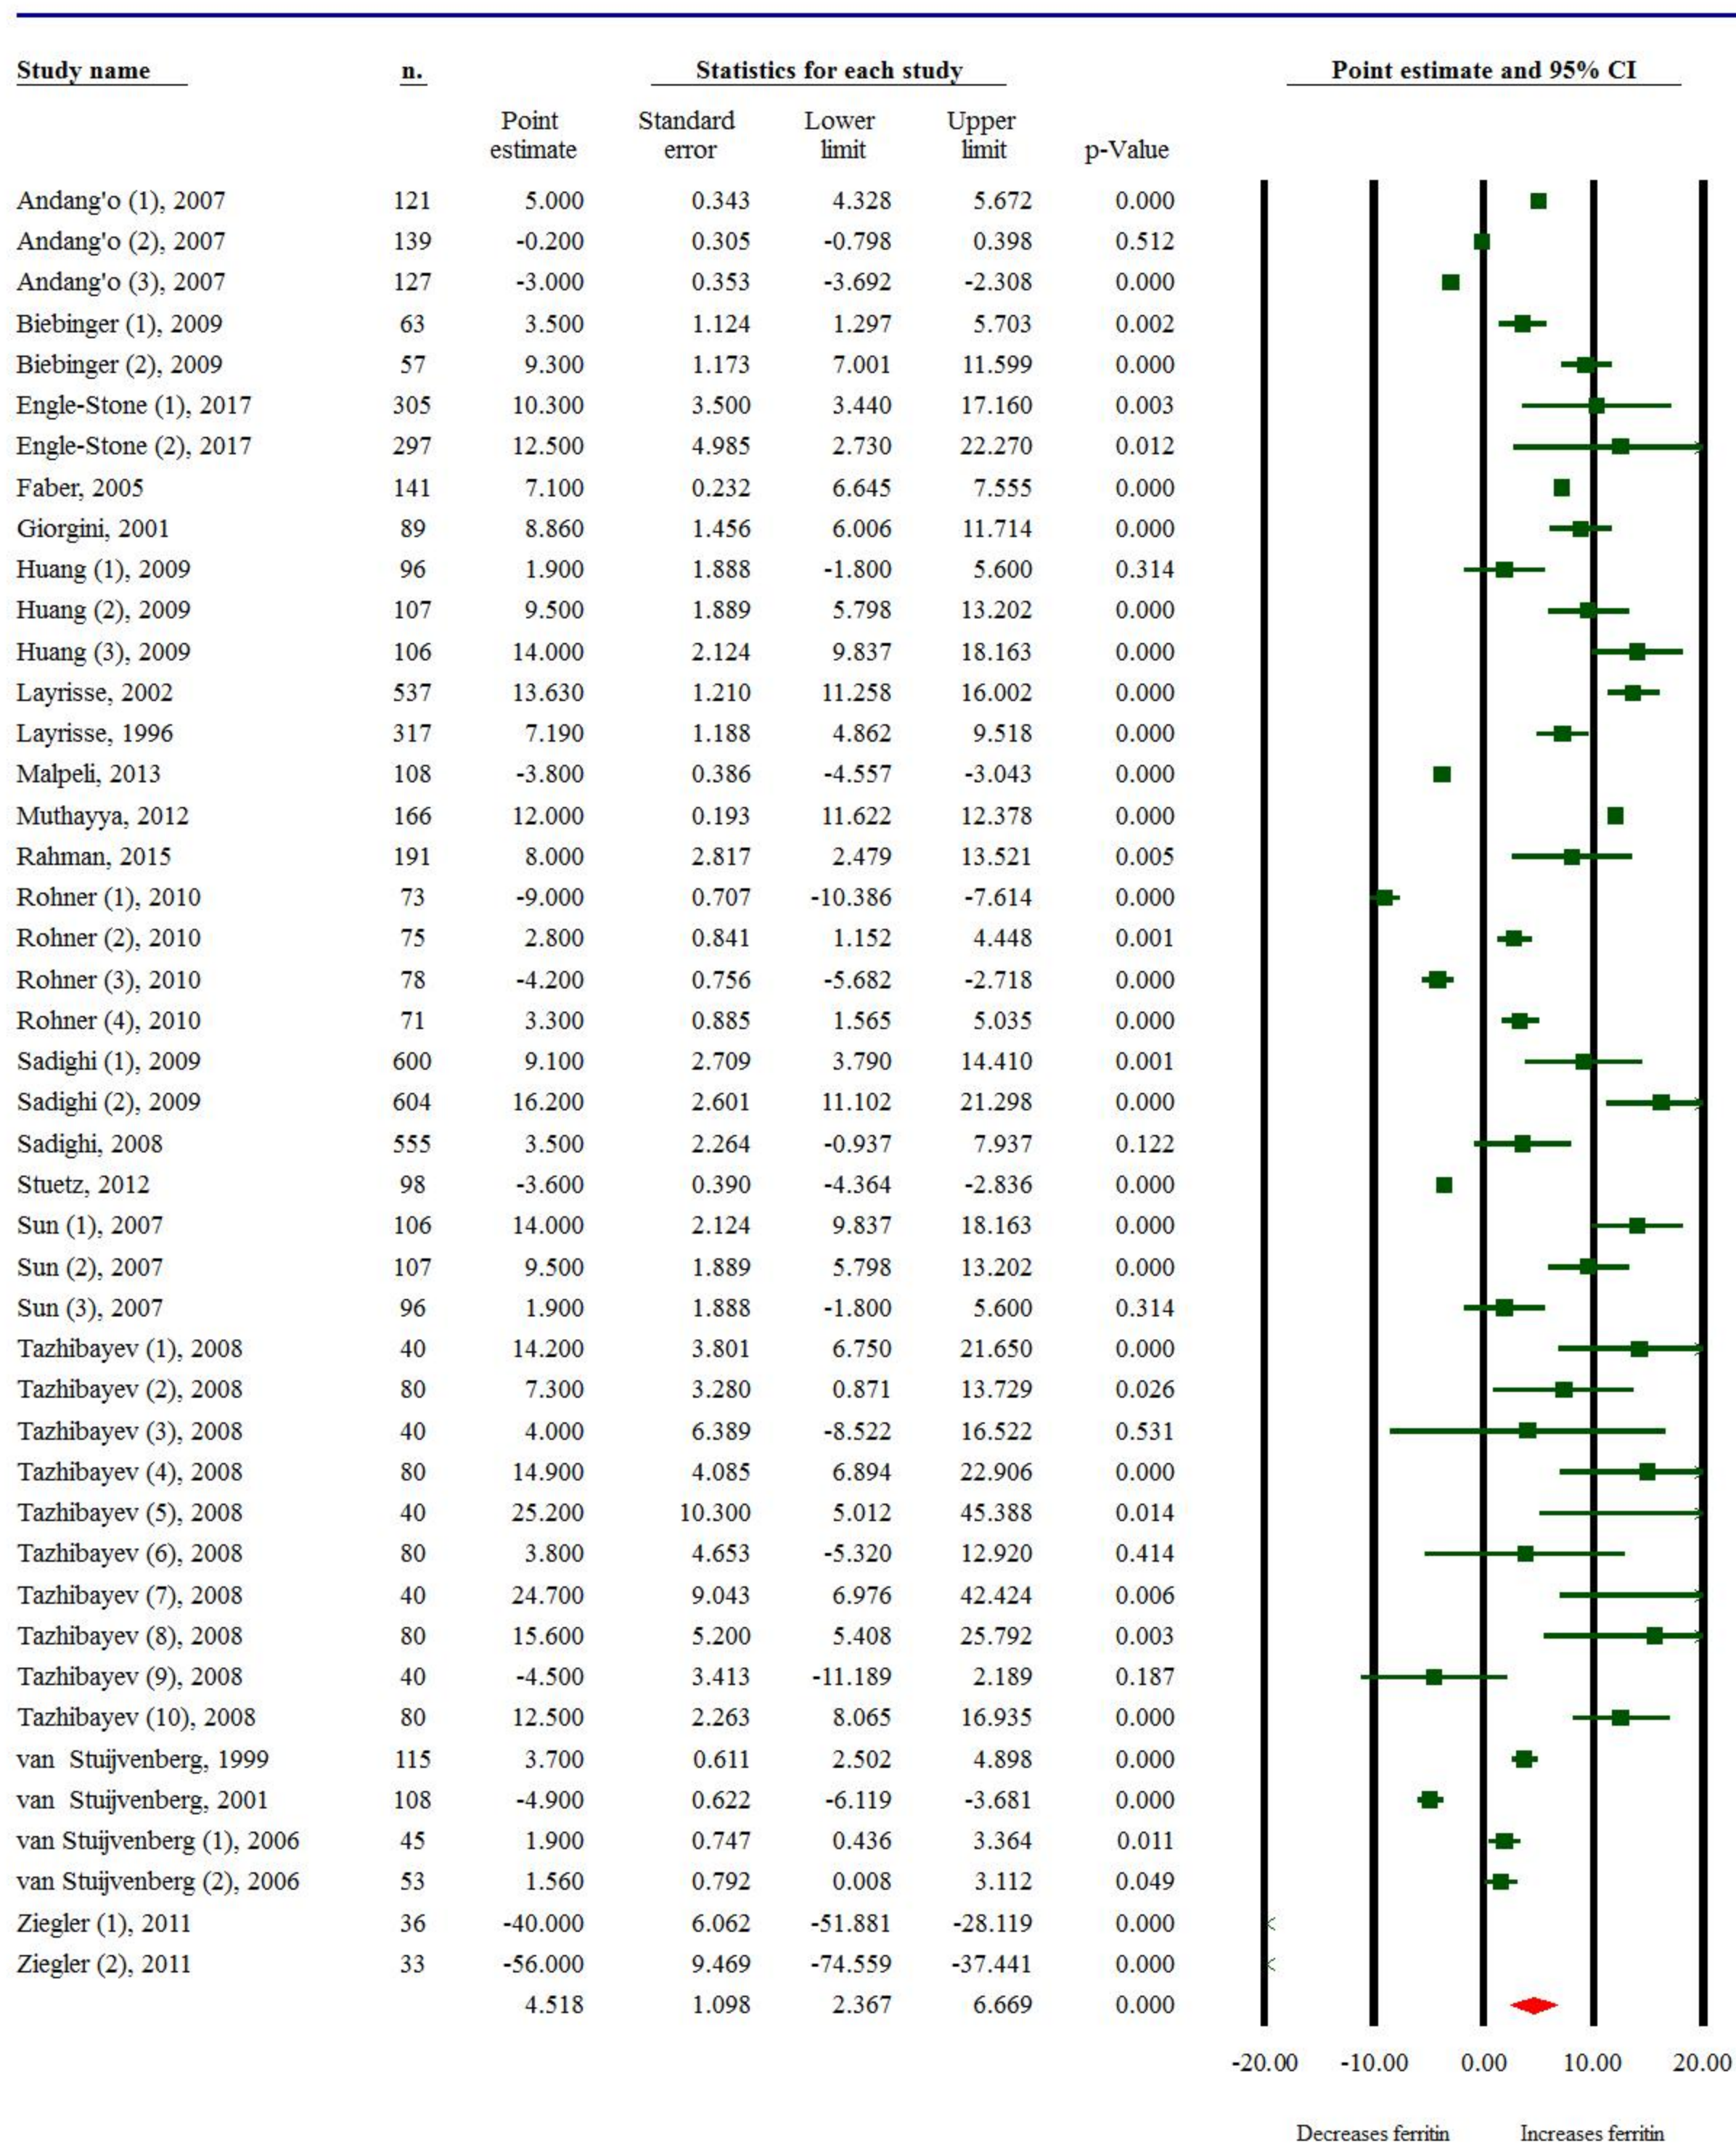

Fig. S2 Forest plot: effect of iron-fortified flour on the mean ferritin (ng/ml), before-after studies

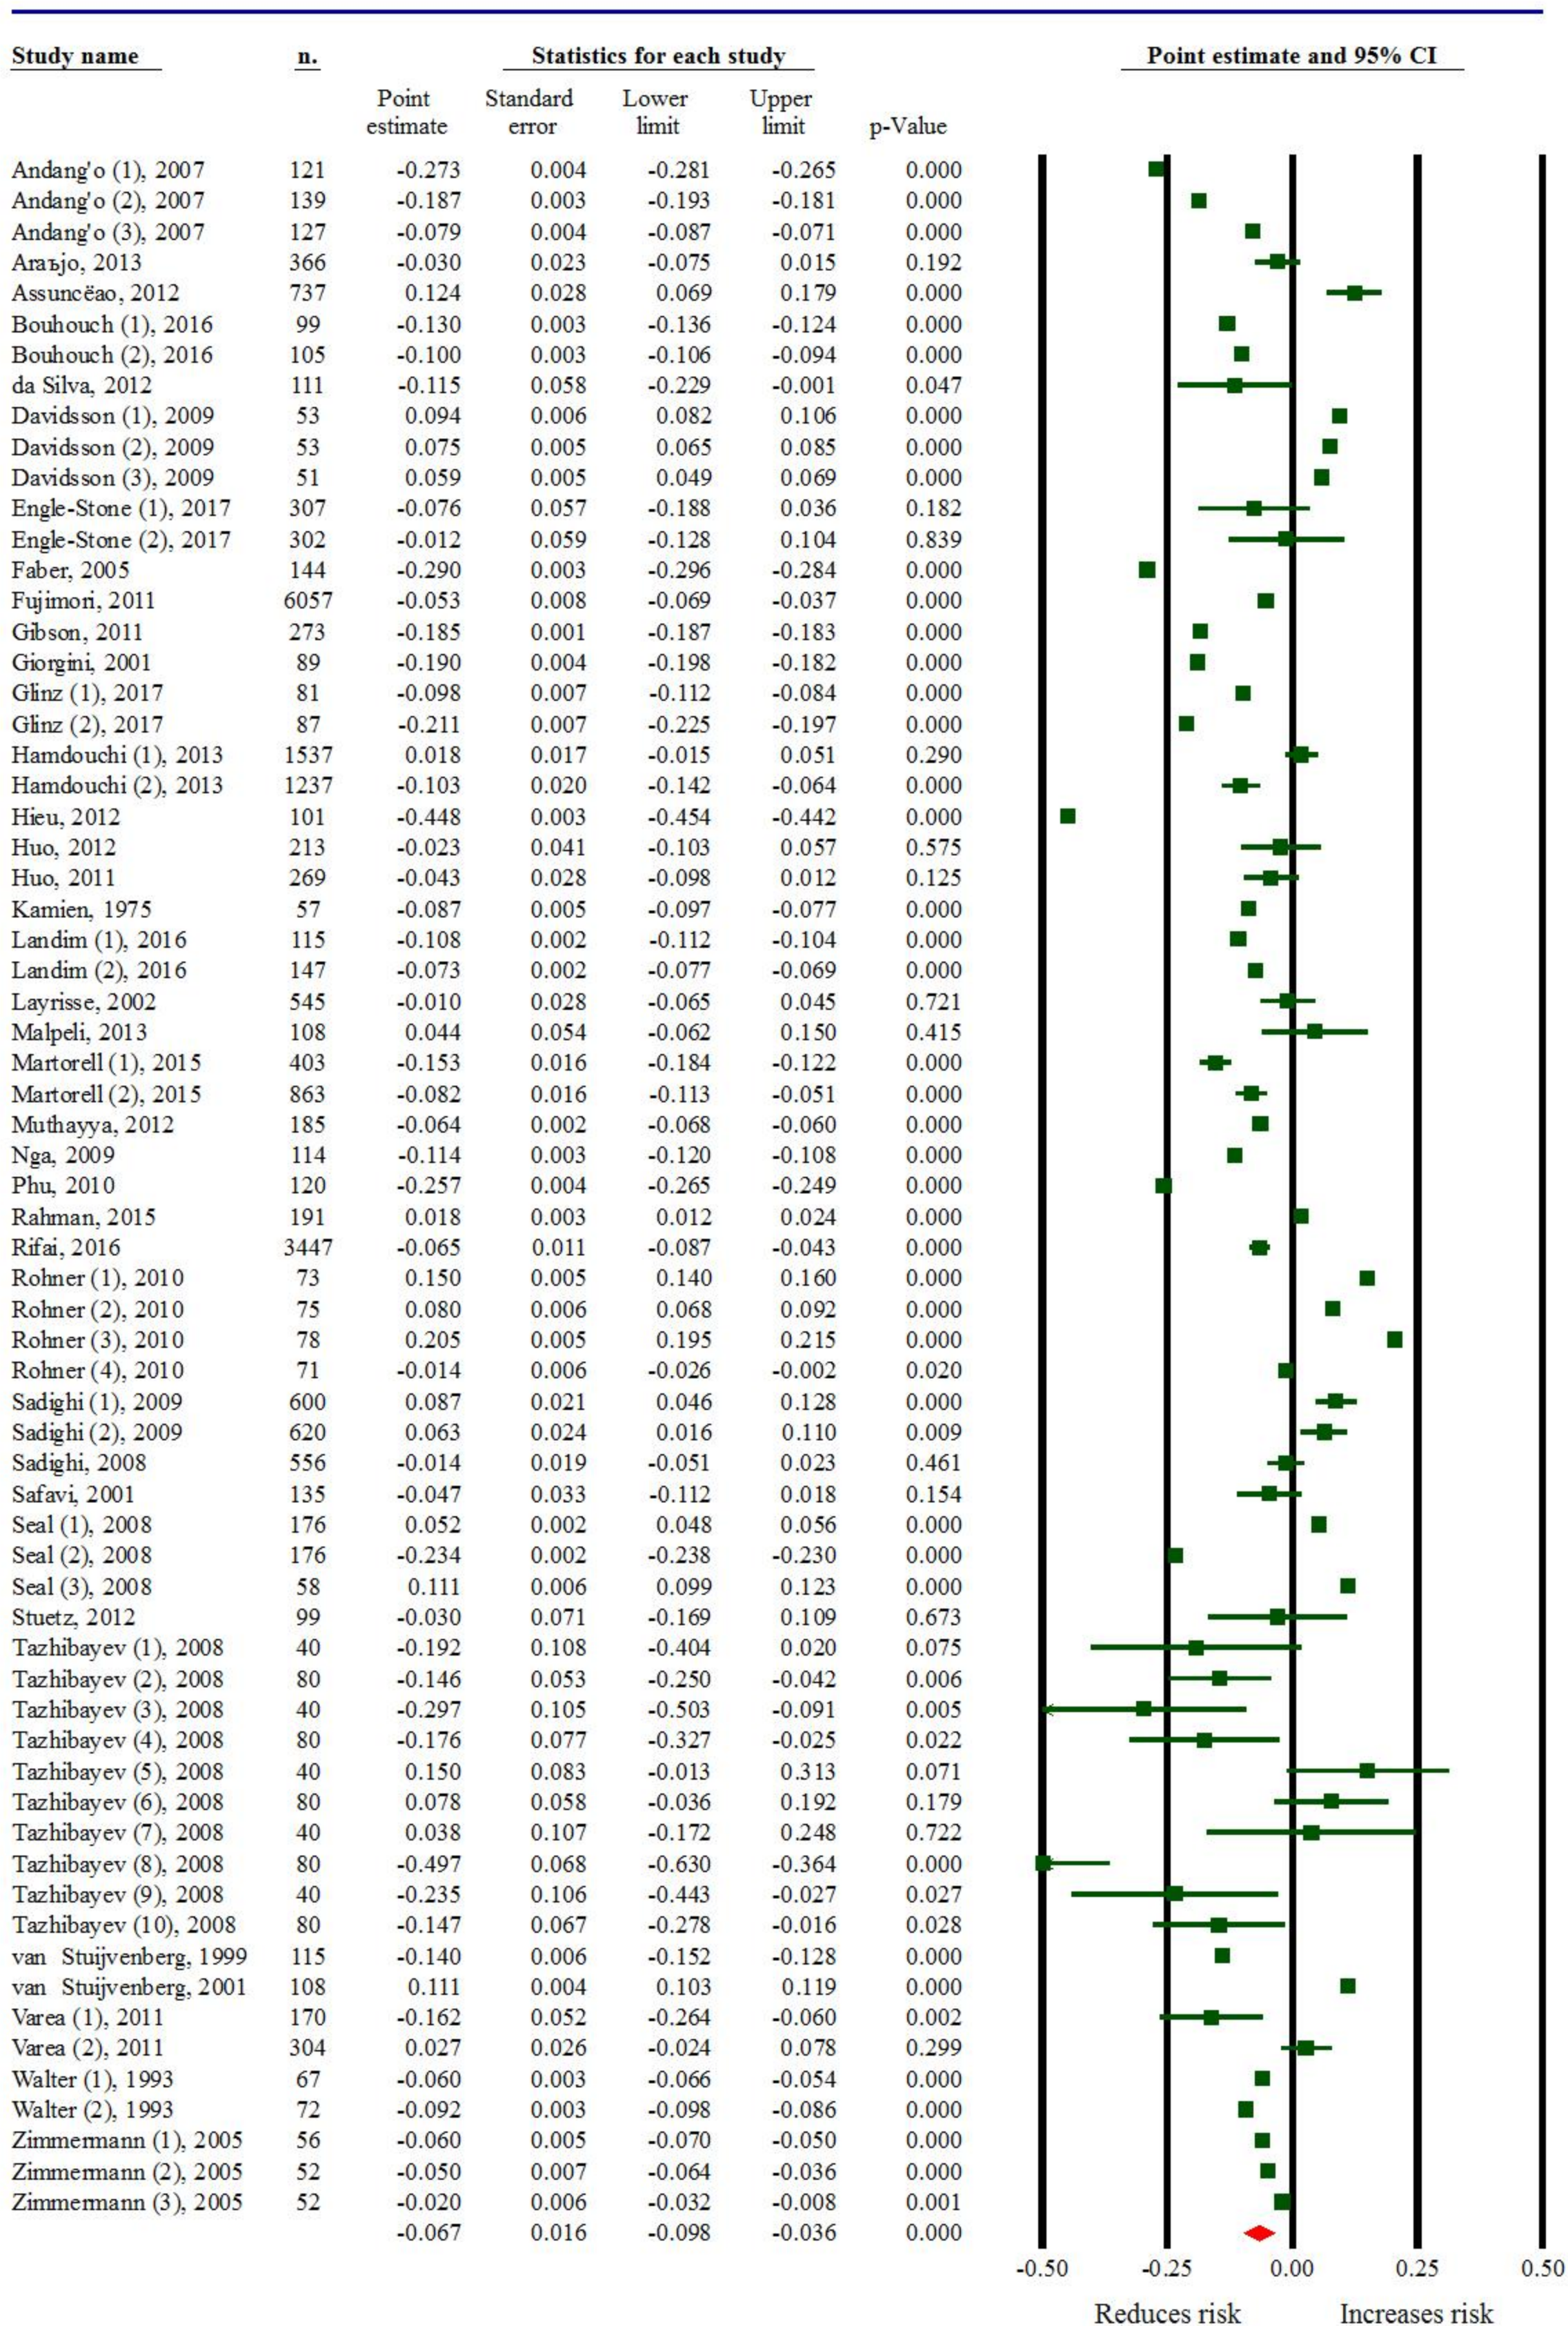

Fig. S3 Forest plot: effect of iron-fortified flour on the anemia prevalence, before-after studies

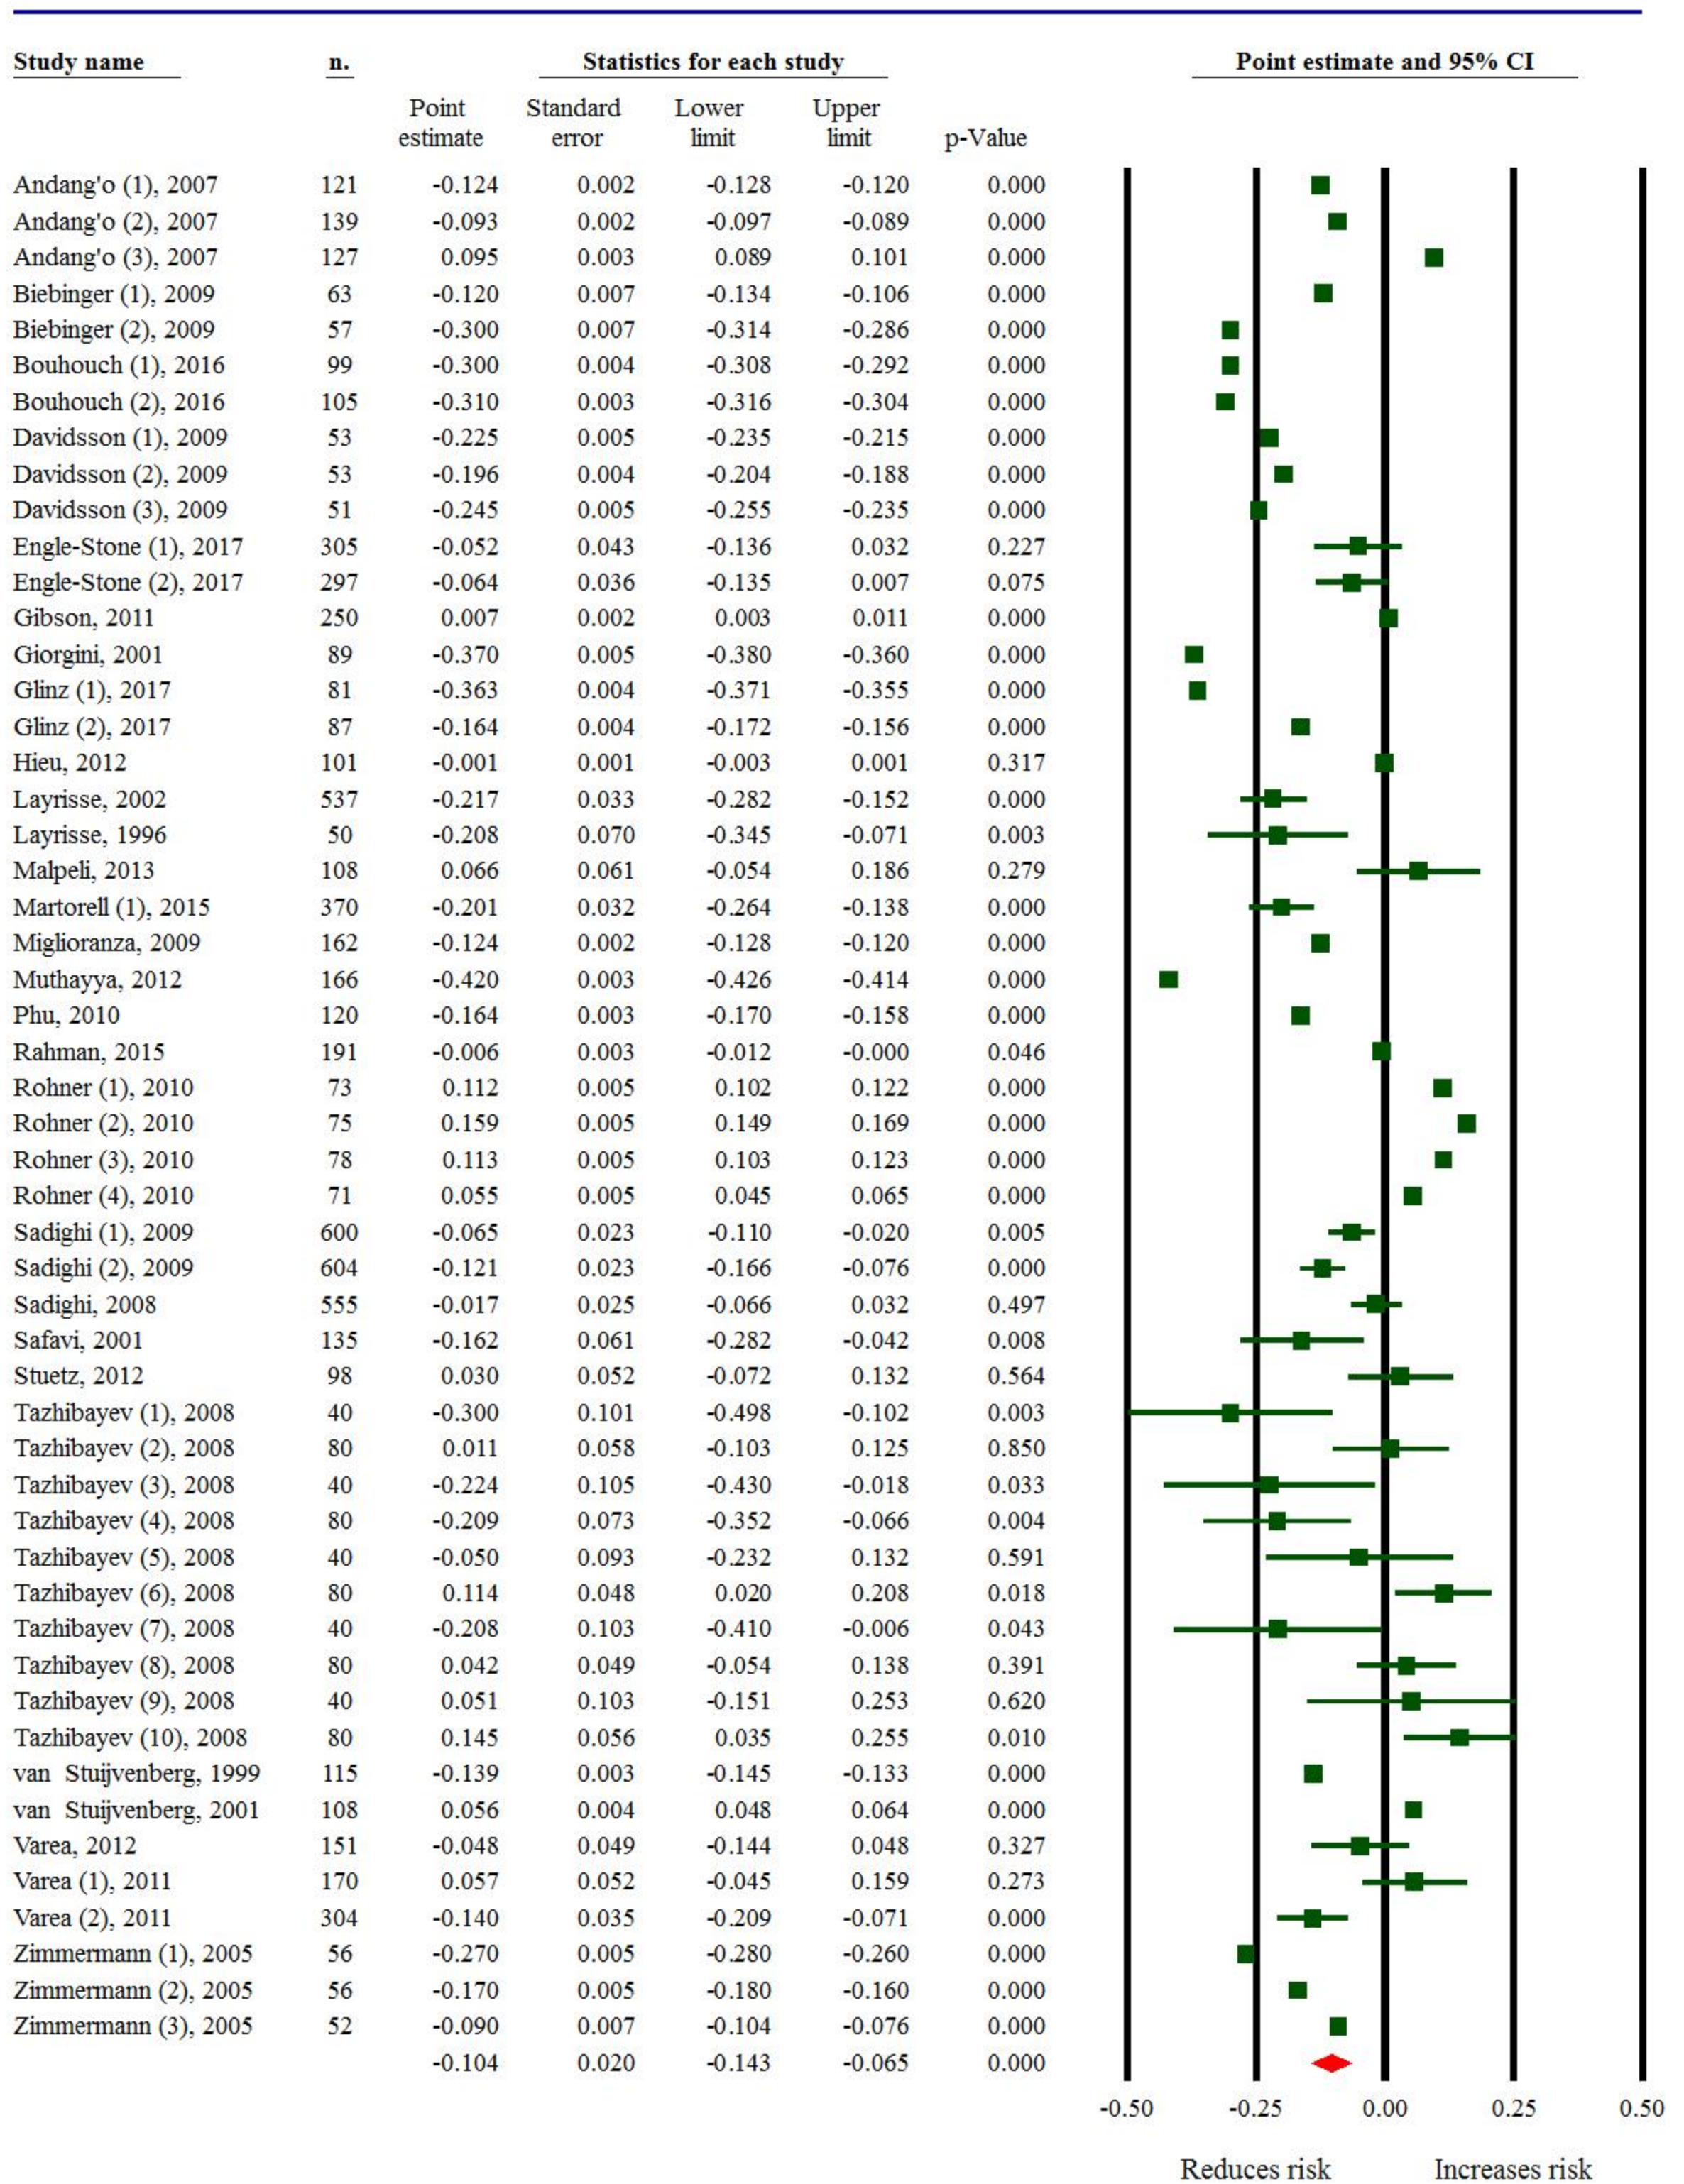

Fig. S4 Forest plot: effect of iron-fortified flour on the ID prevalence, before-after studies

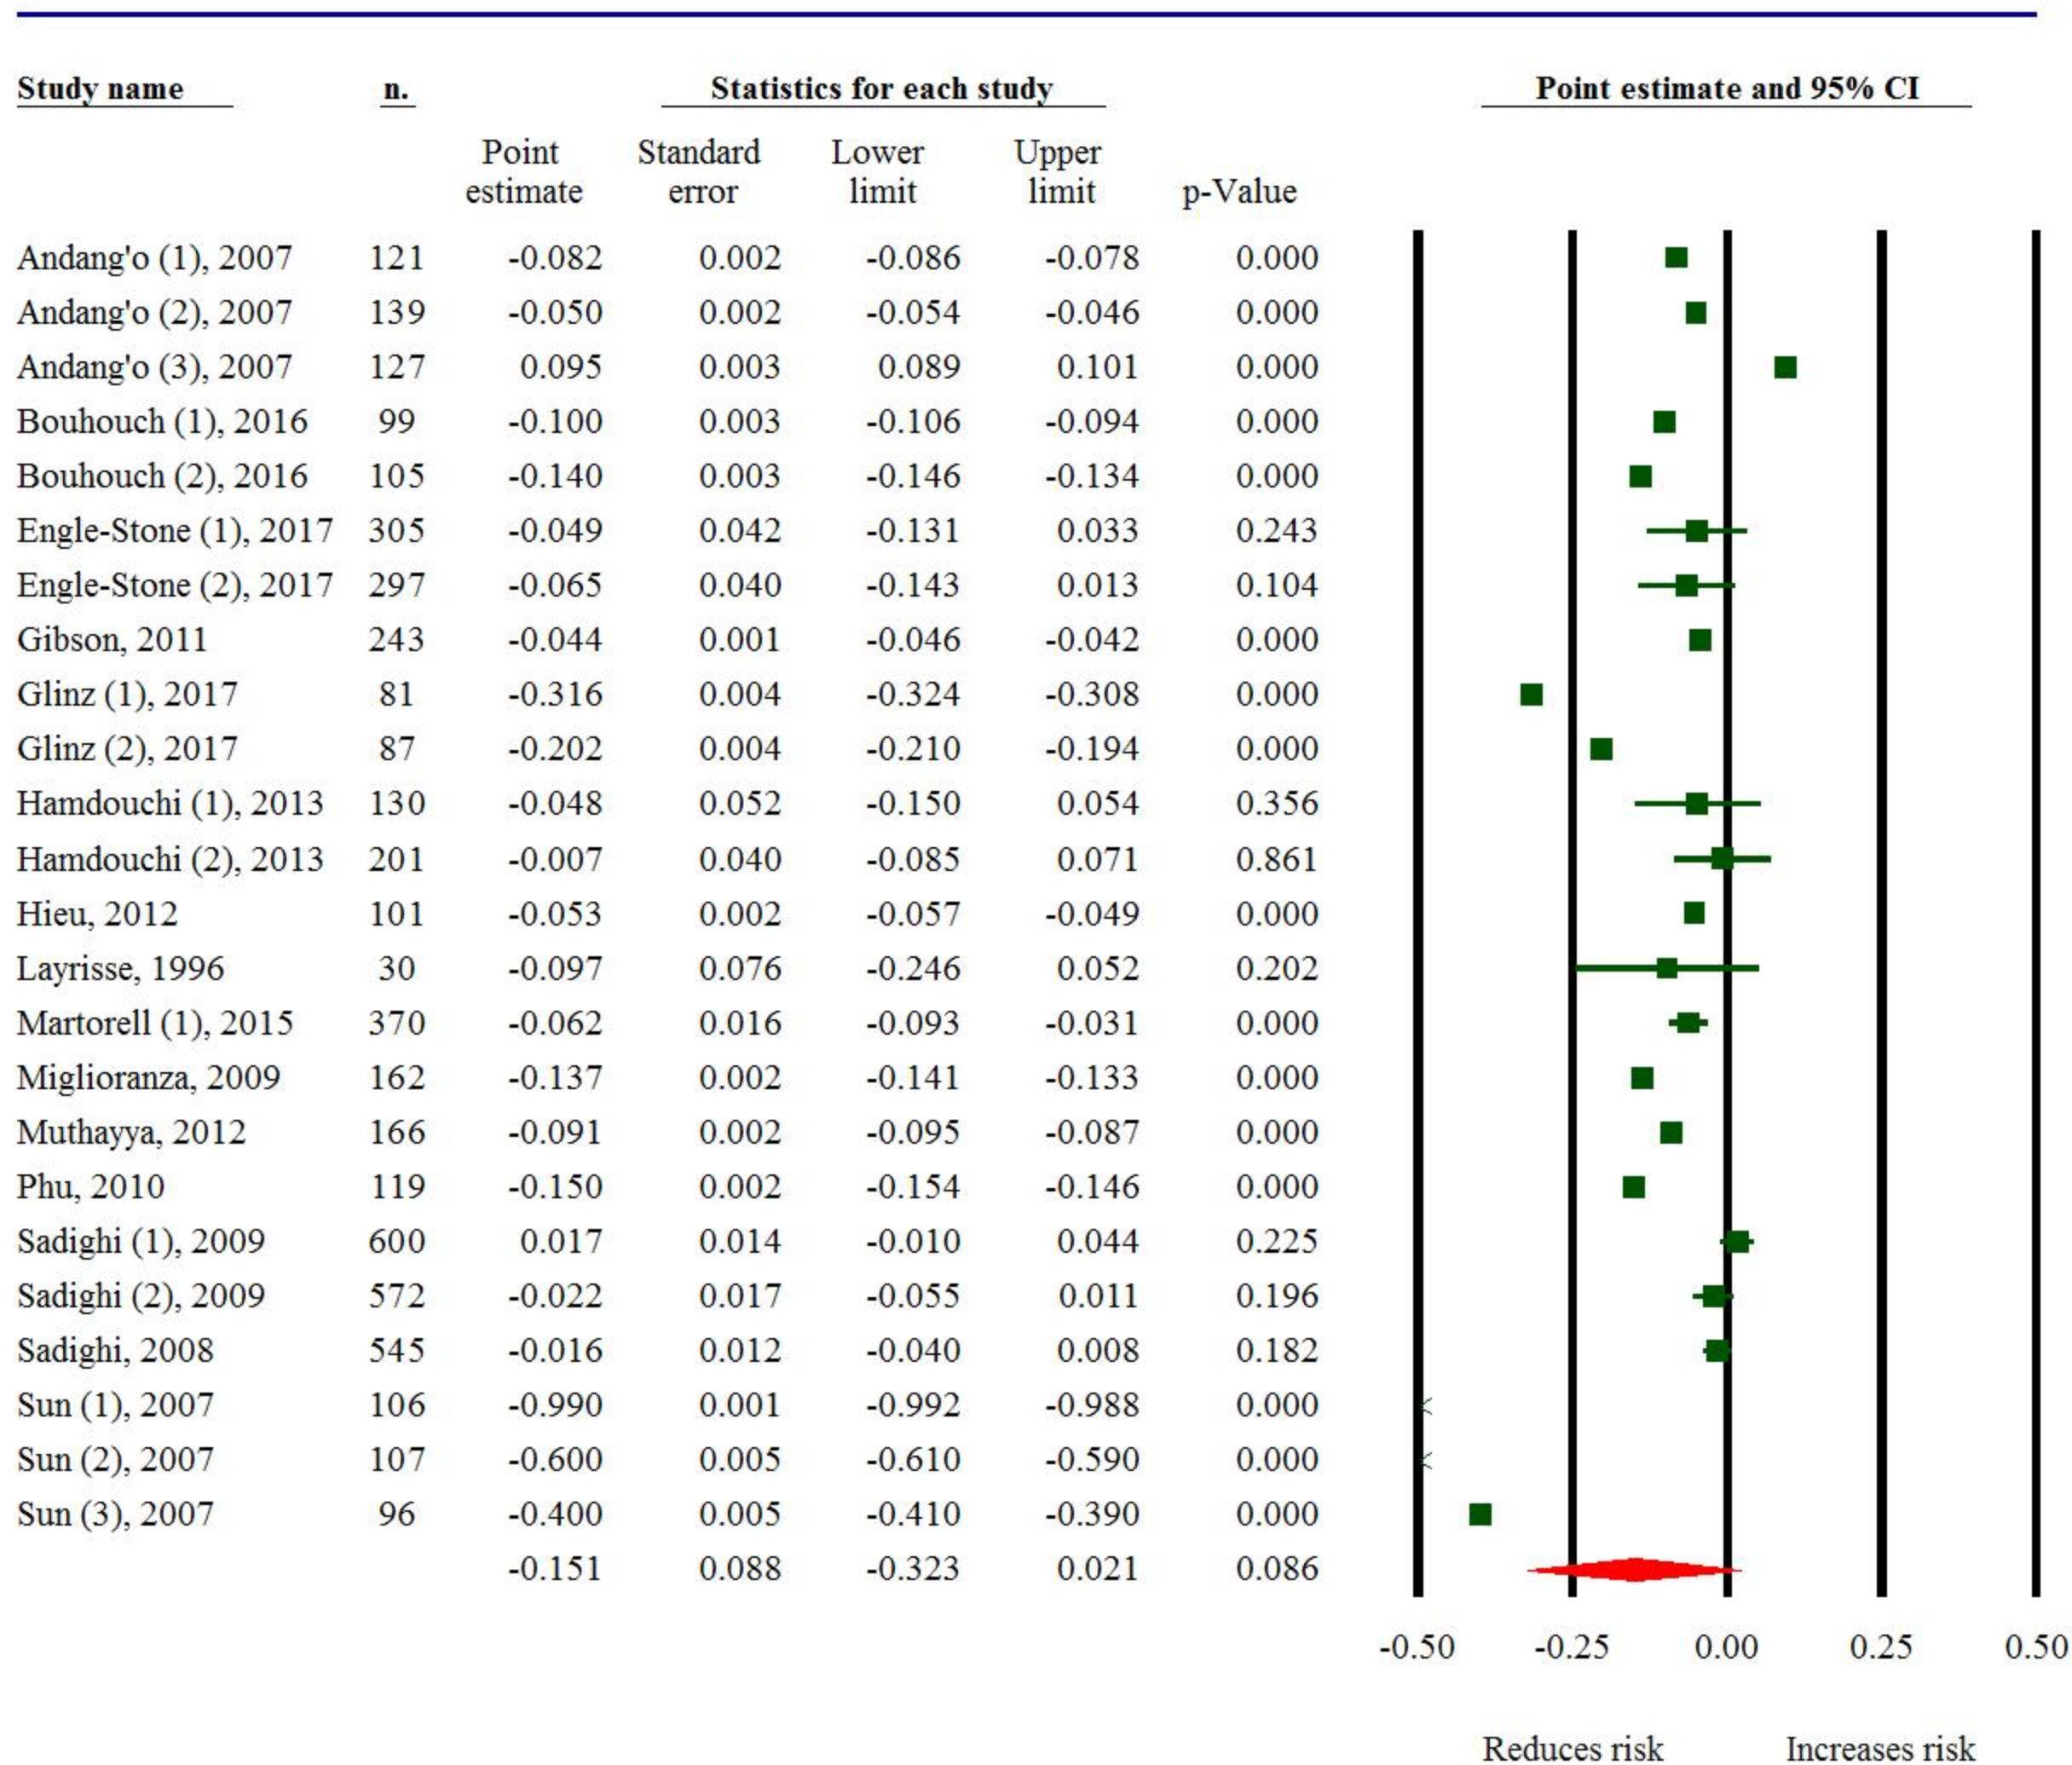

Fig. S5 Forest plot: effect of iron-fortified flour on the IDA prevalence, before-after studies

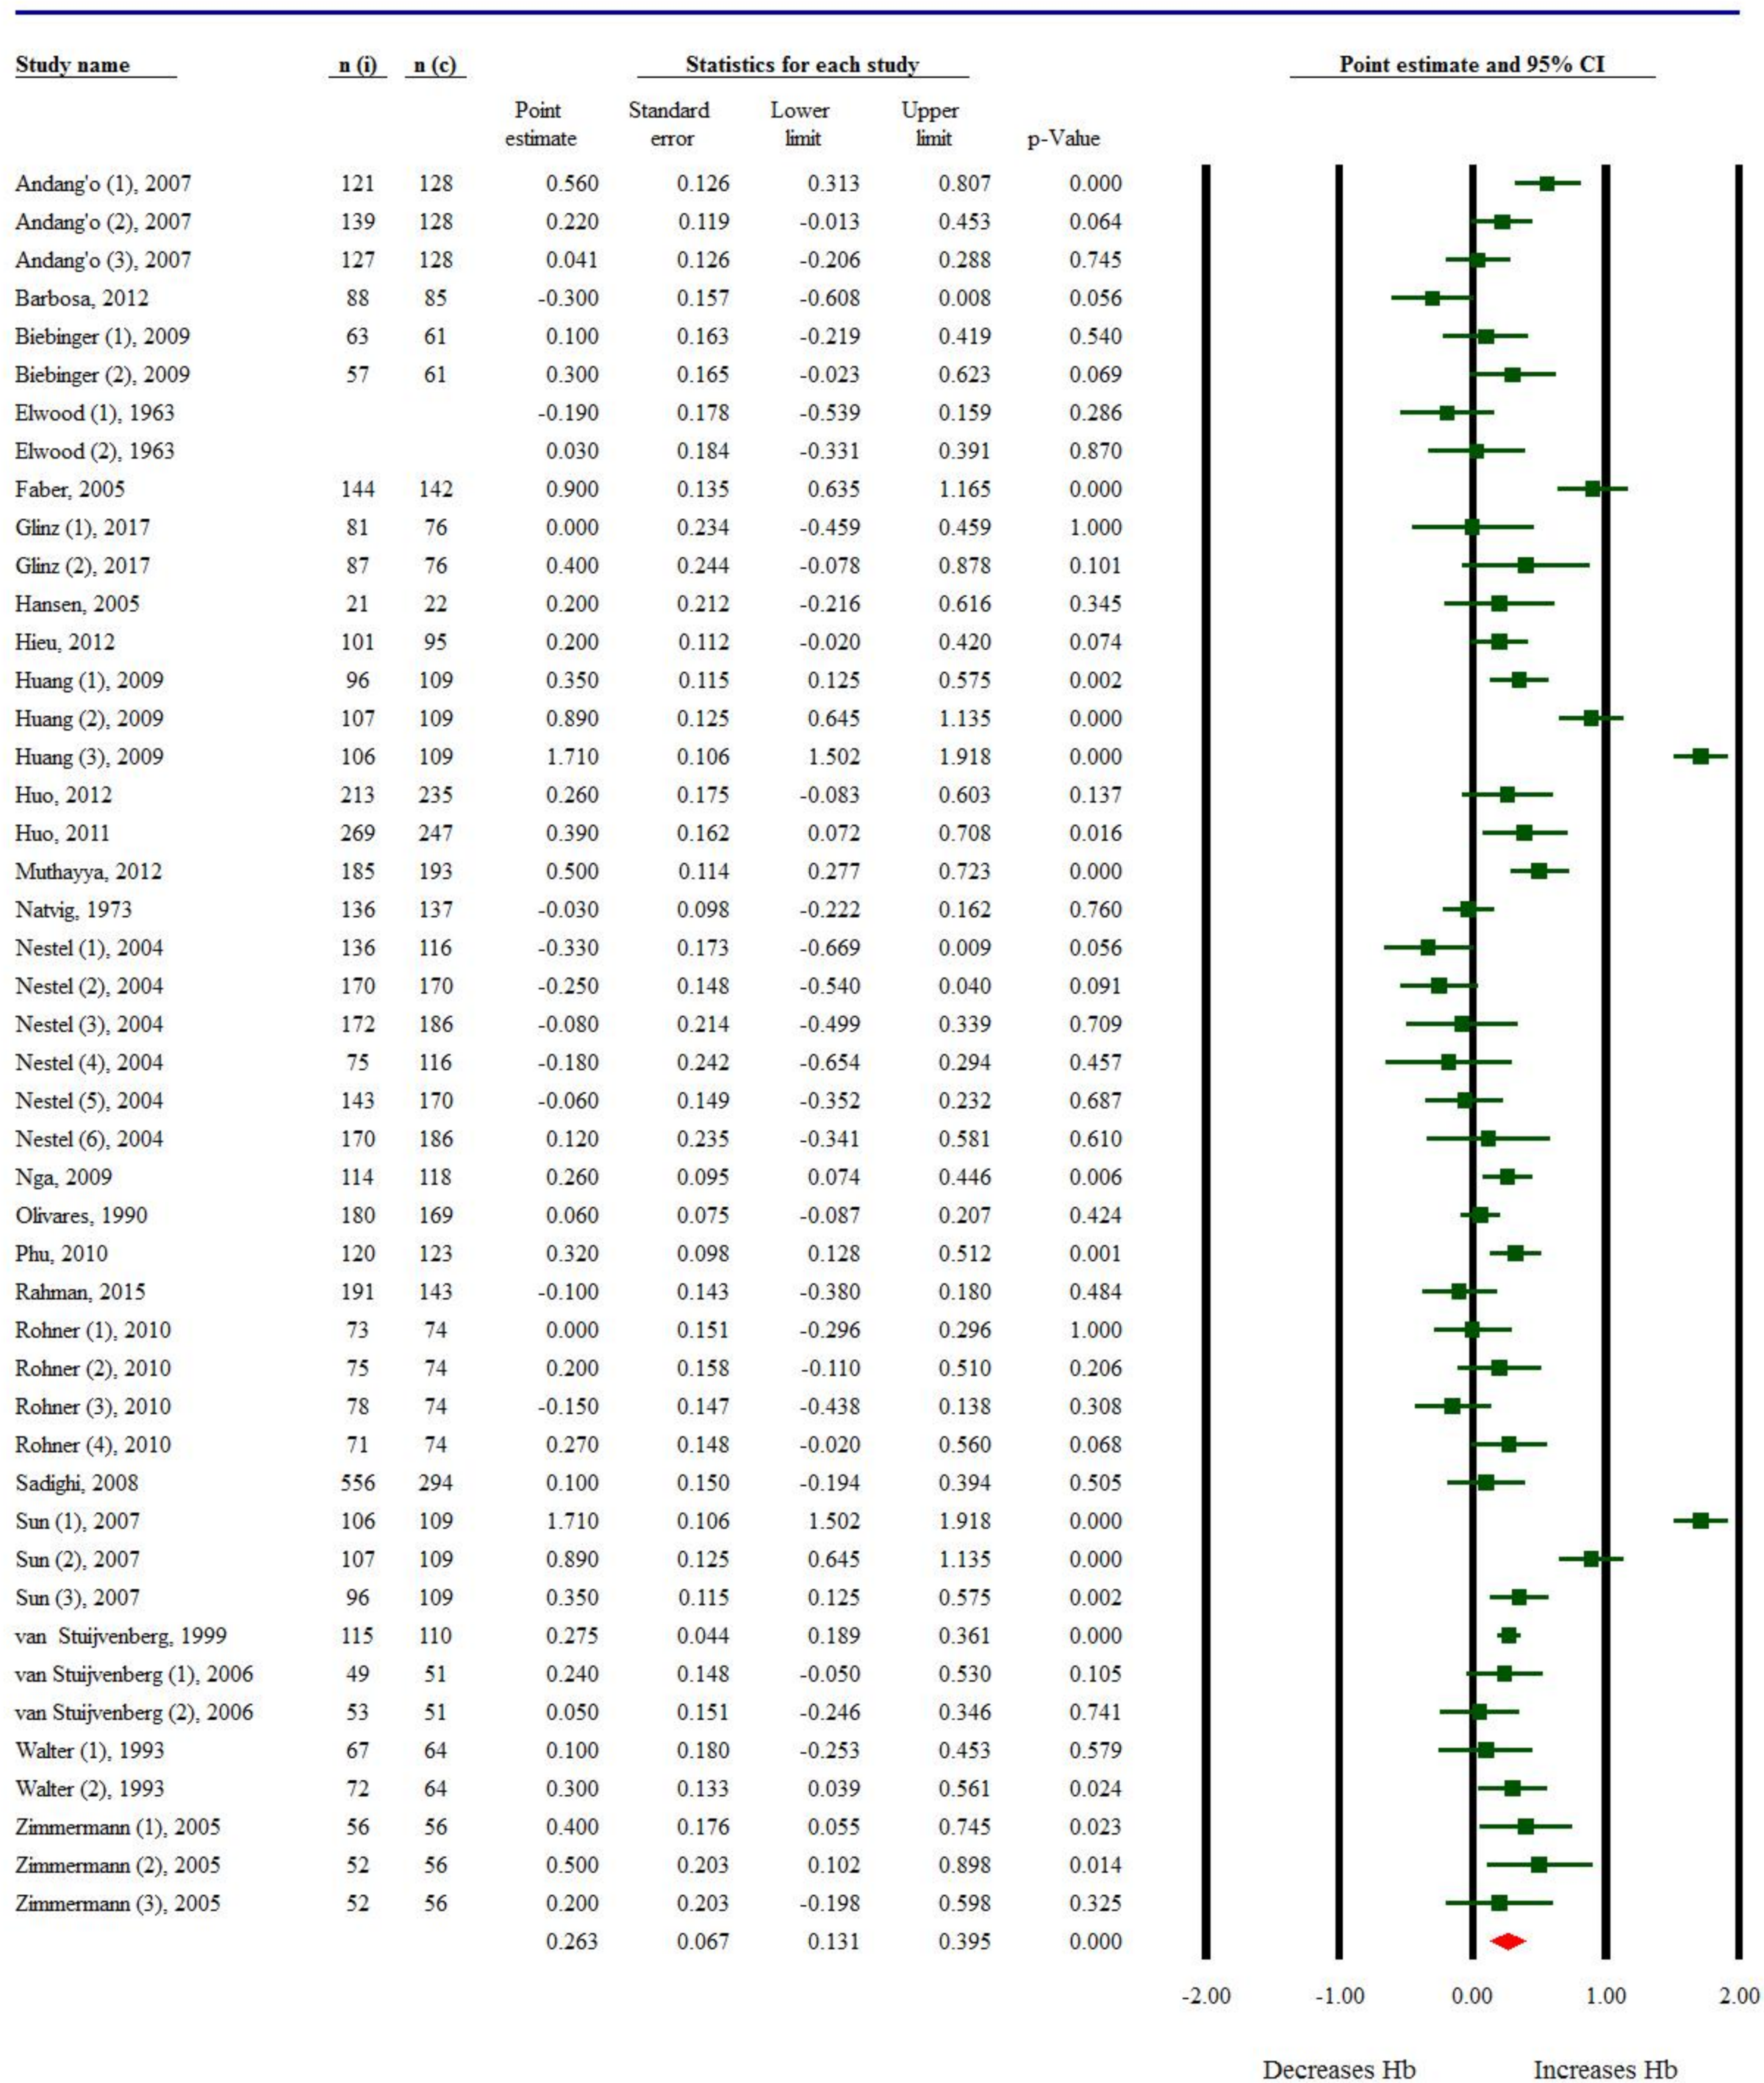

Fig. S6 Forest plot: effect of iron-fortified flour on the mean hemoglobin (g/dL), controlled trials

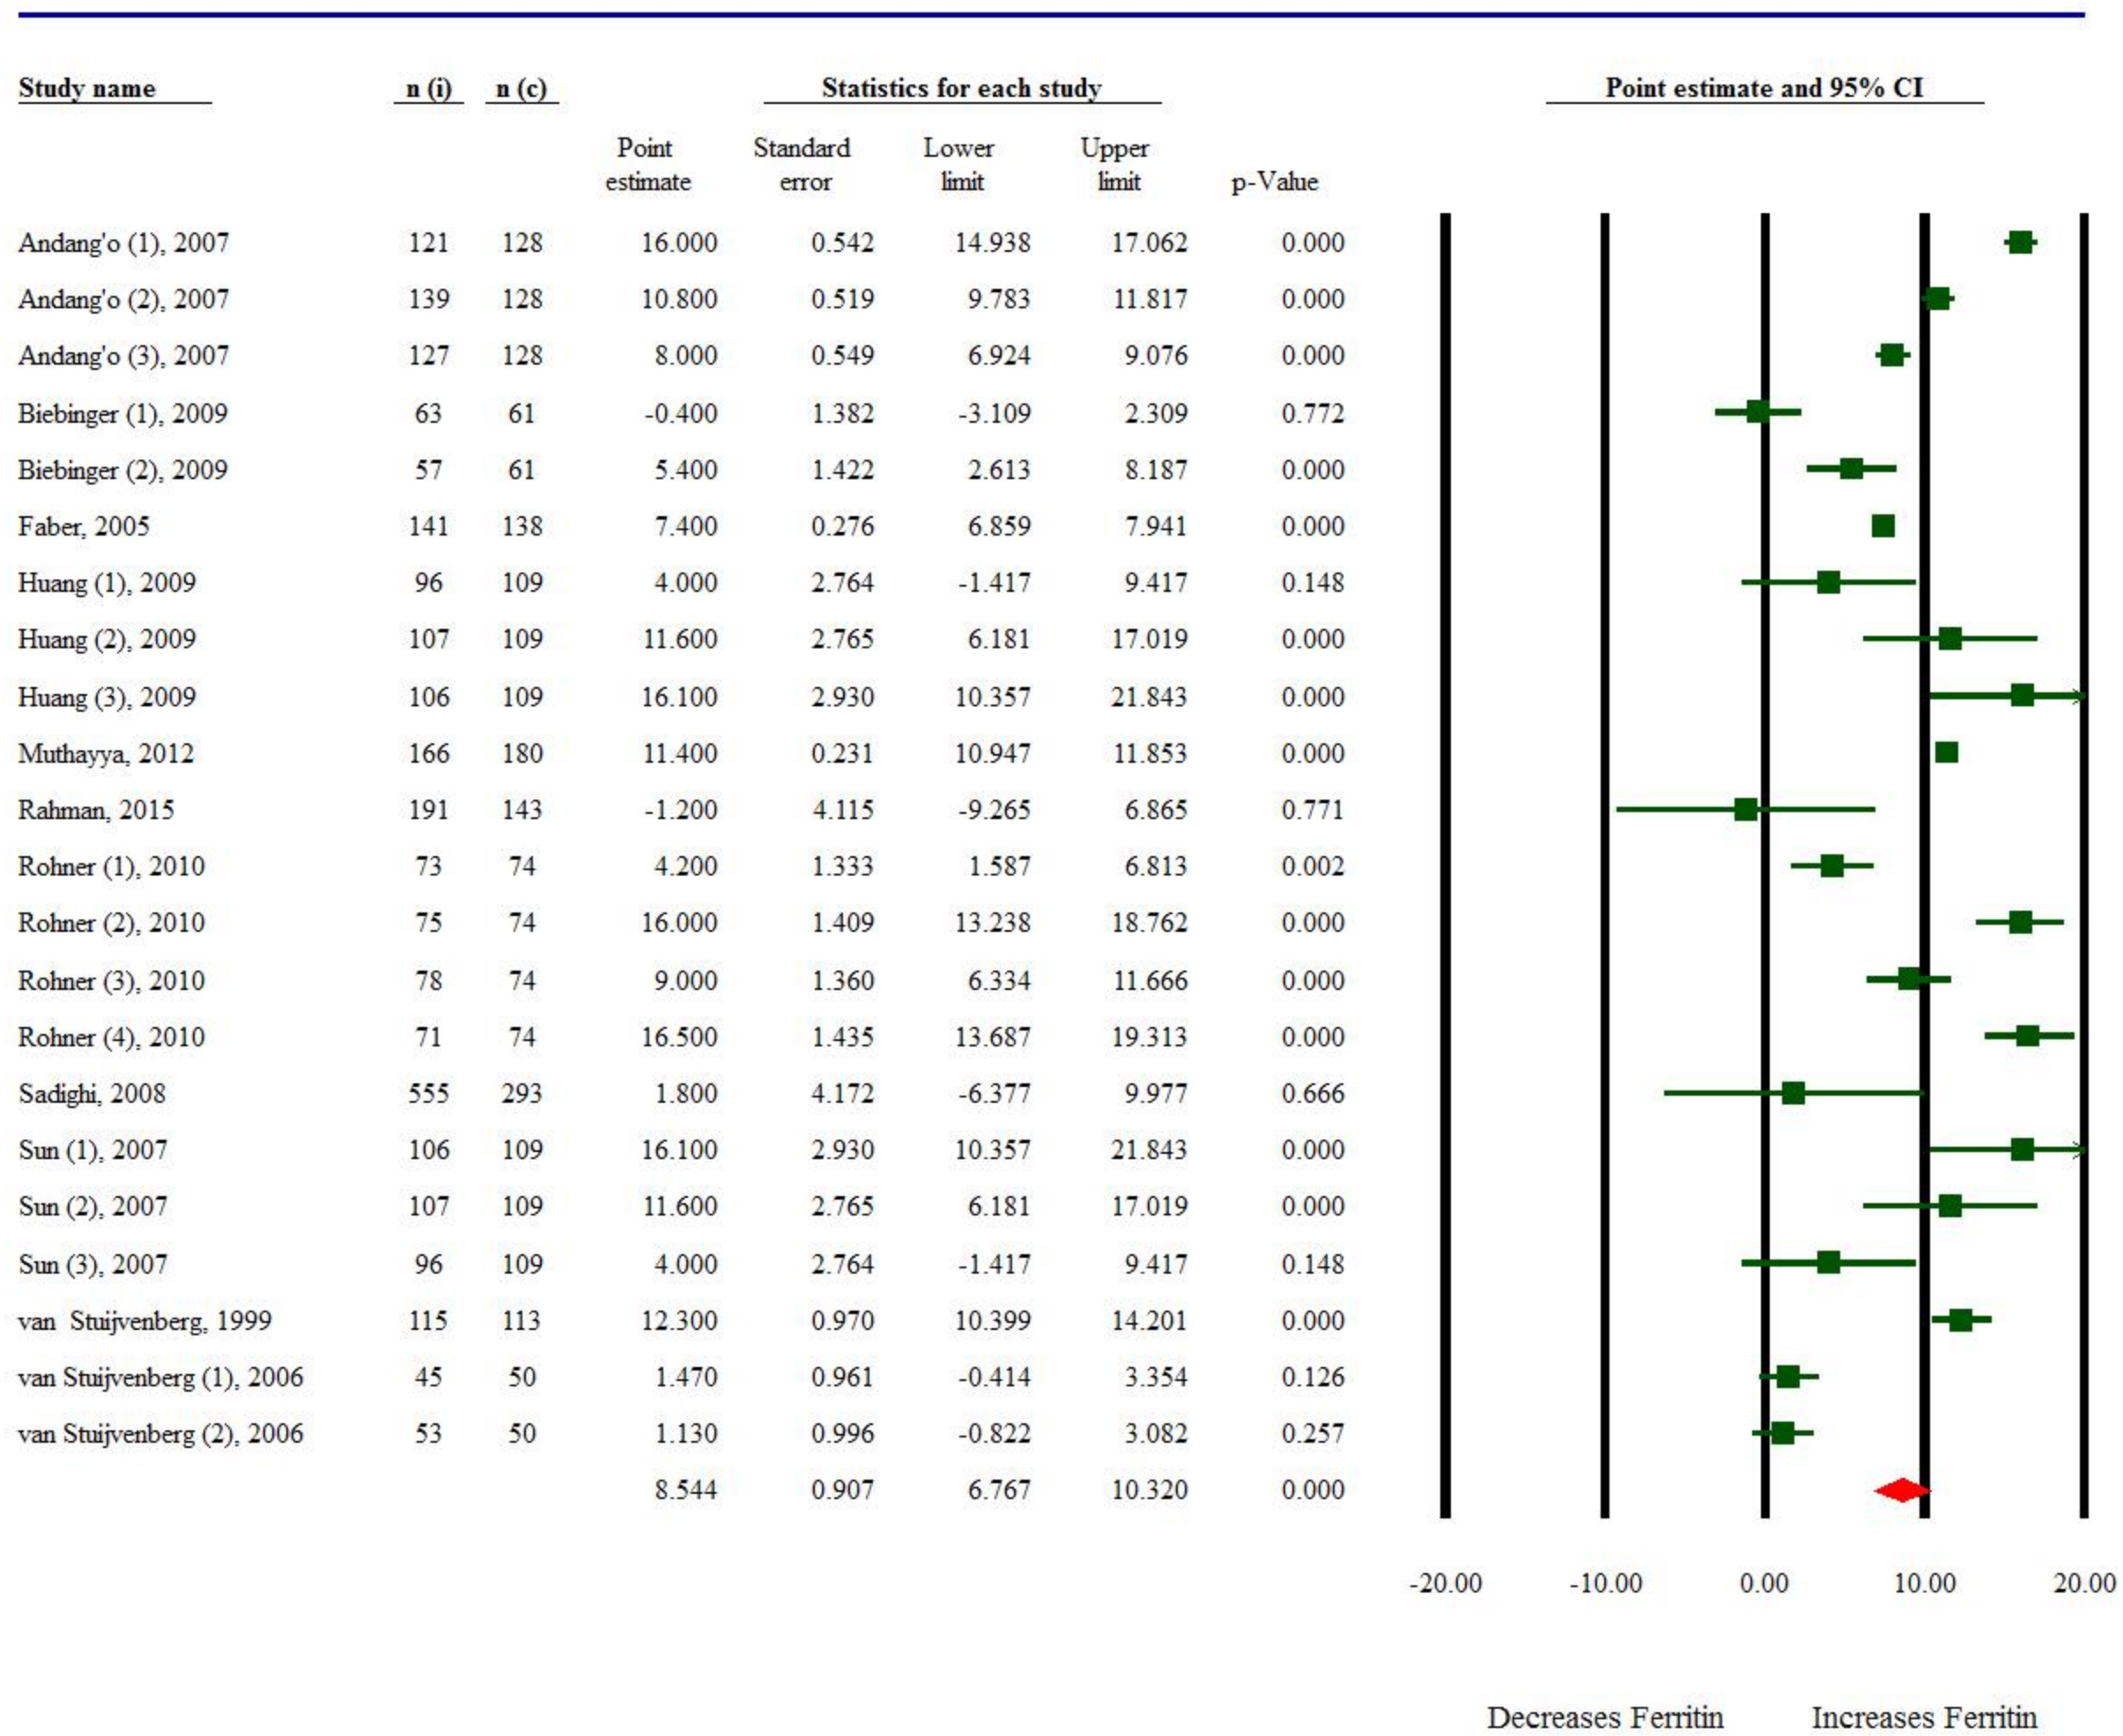

Fig. S7 Forest plot: effect of iron-fortified flour on the mean ferritin (ng/ml), controlled trials

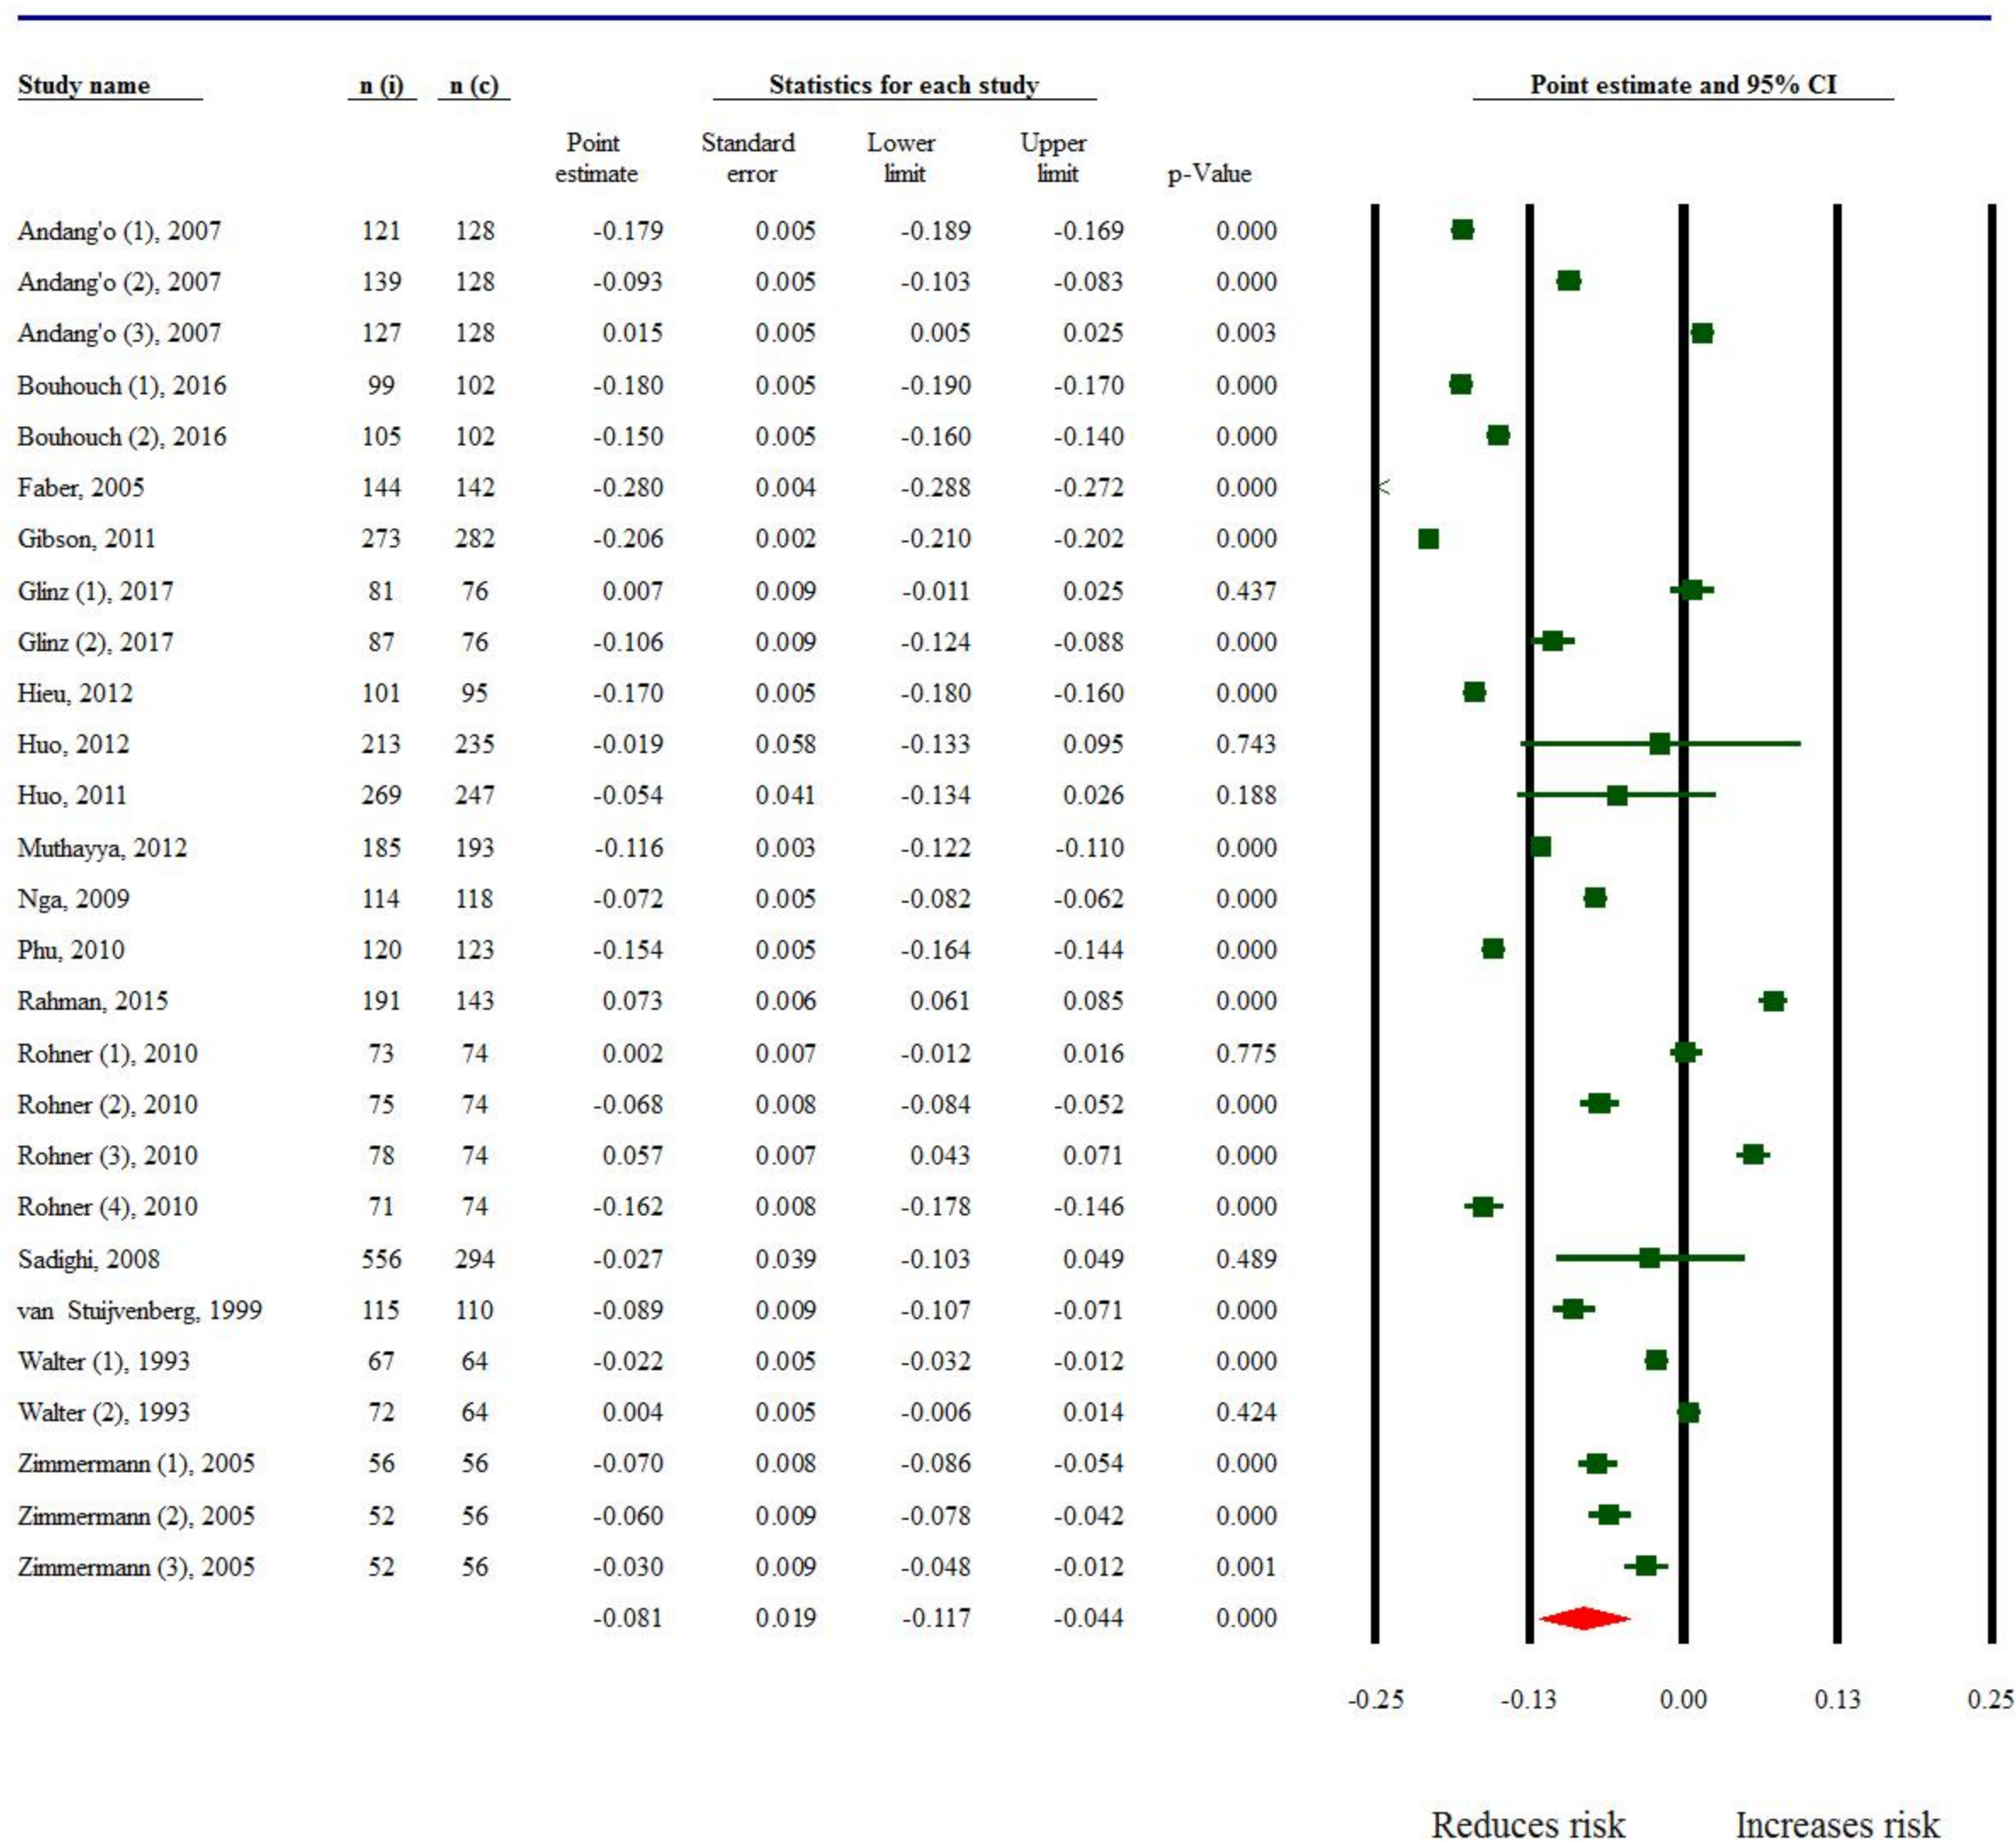

Fig. S8 Forest plot: effect of iron-fortified flour on the anemia prevalence, controlled trials



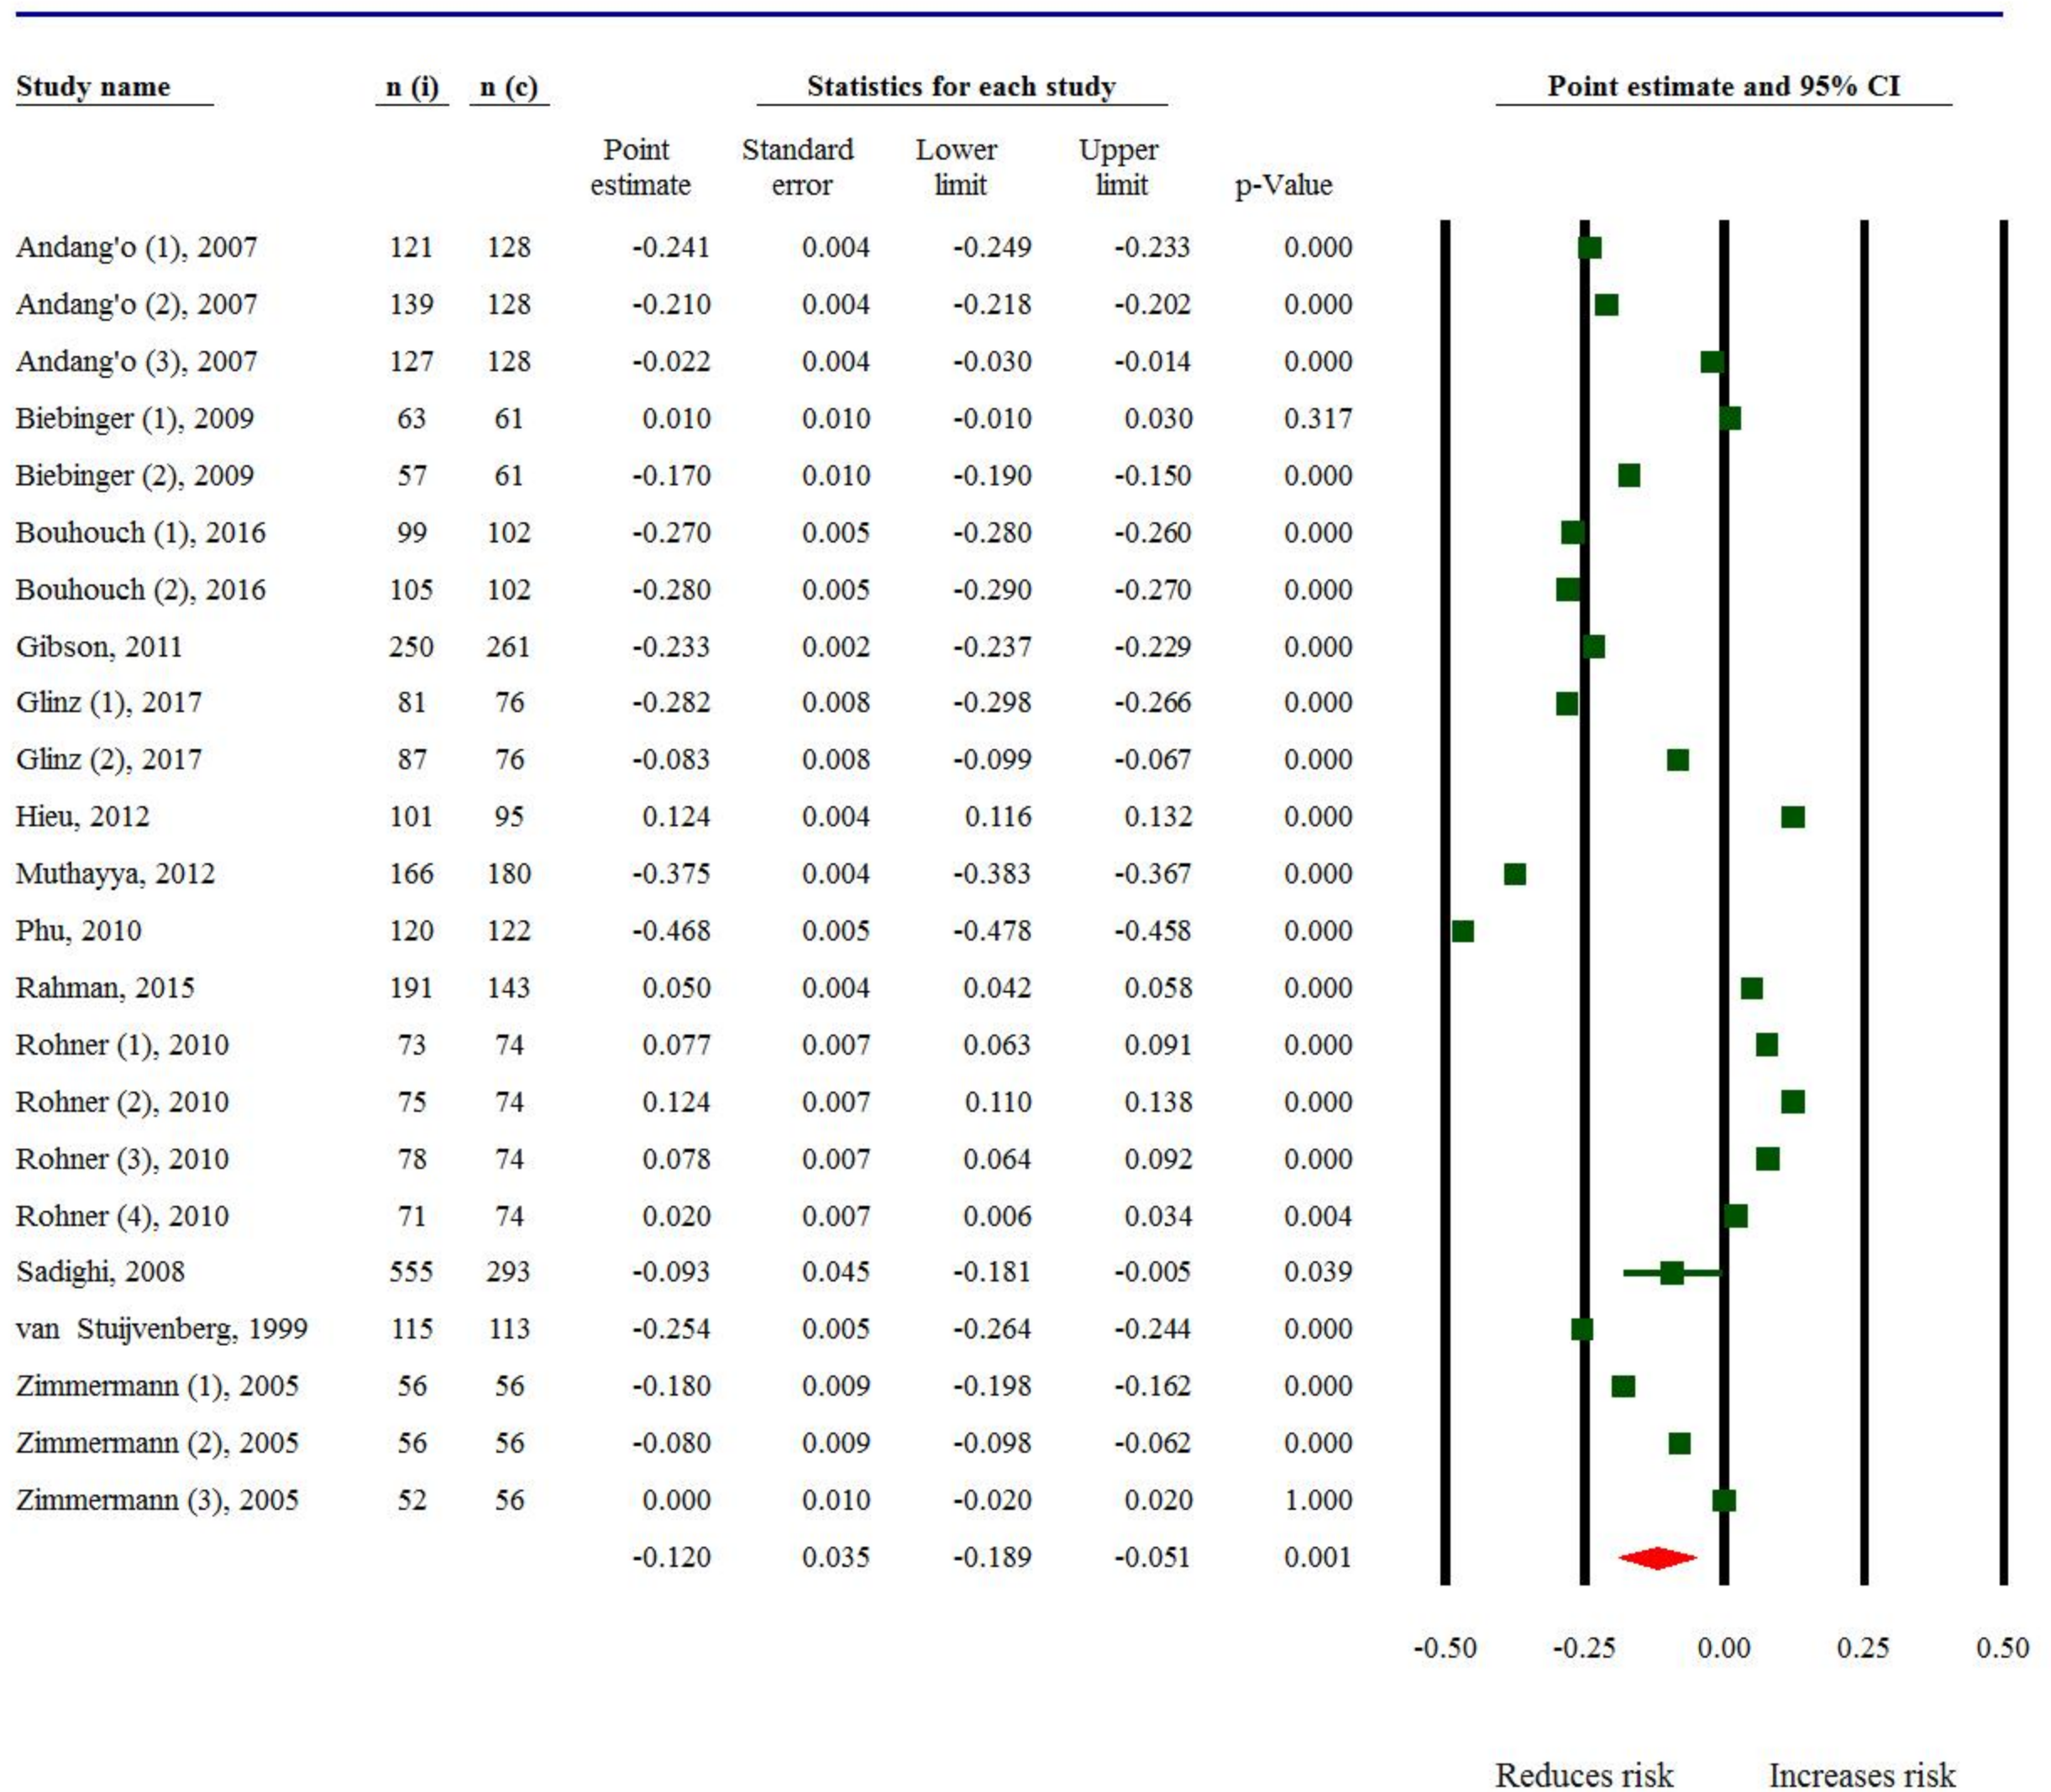

Fig. S9 Forest plot: effect of iron-fortified flour on the ID prevalence, controlled trials

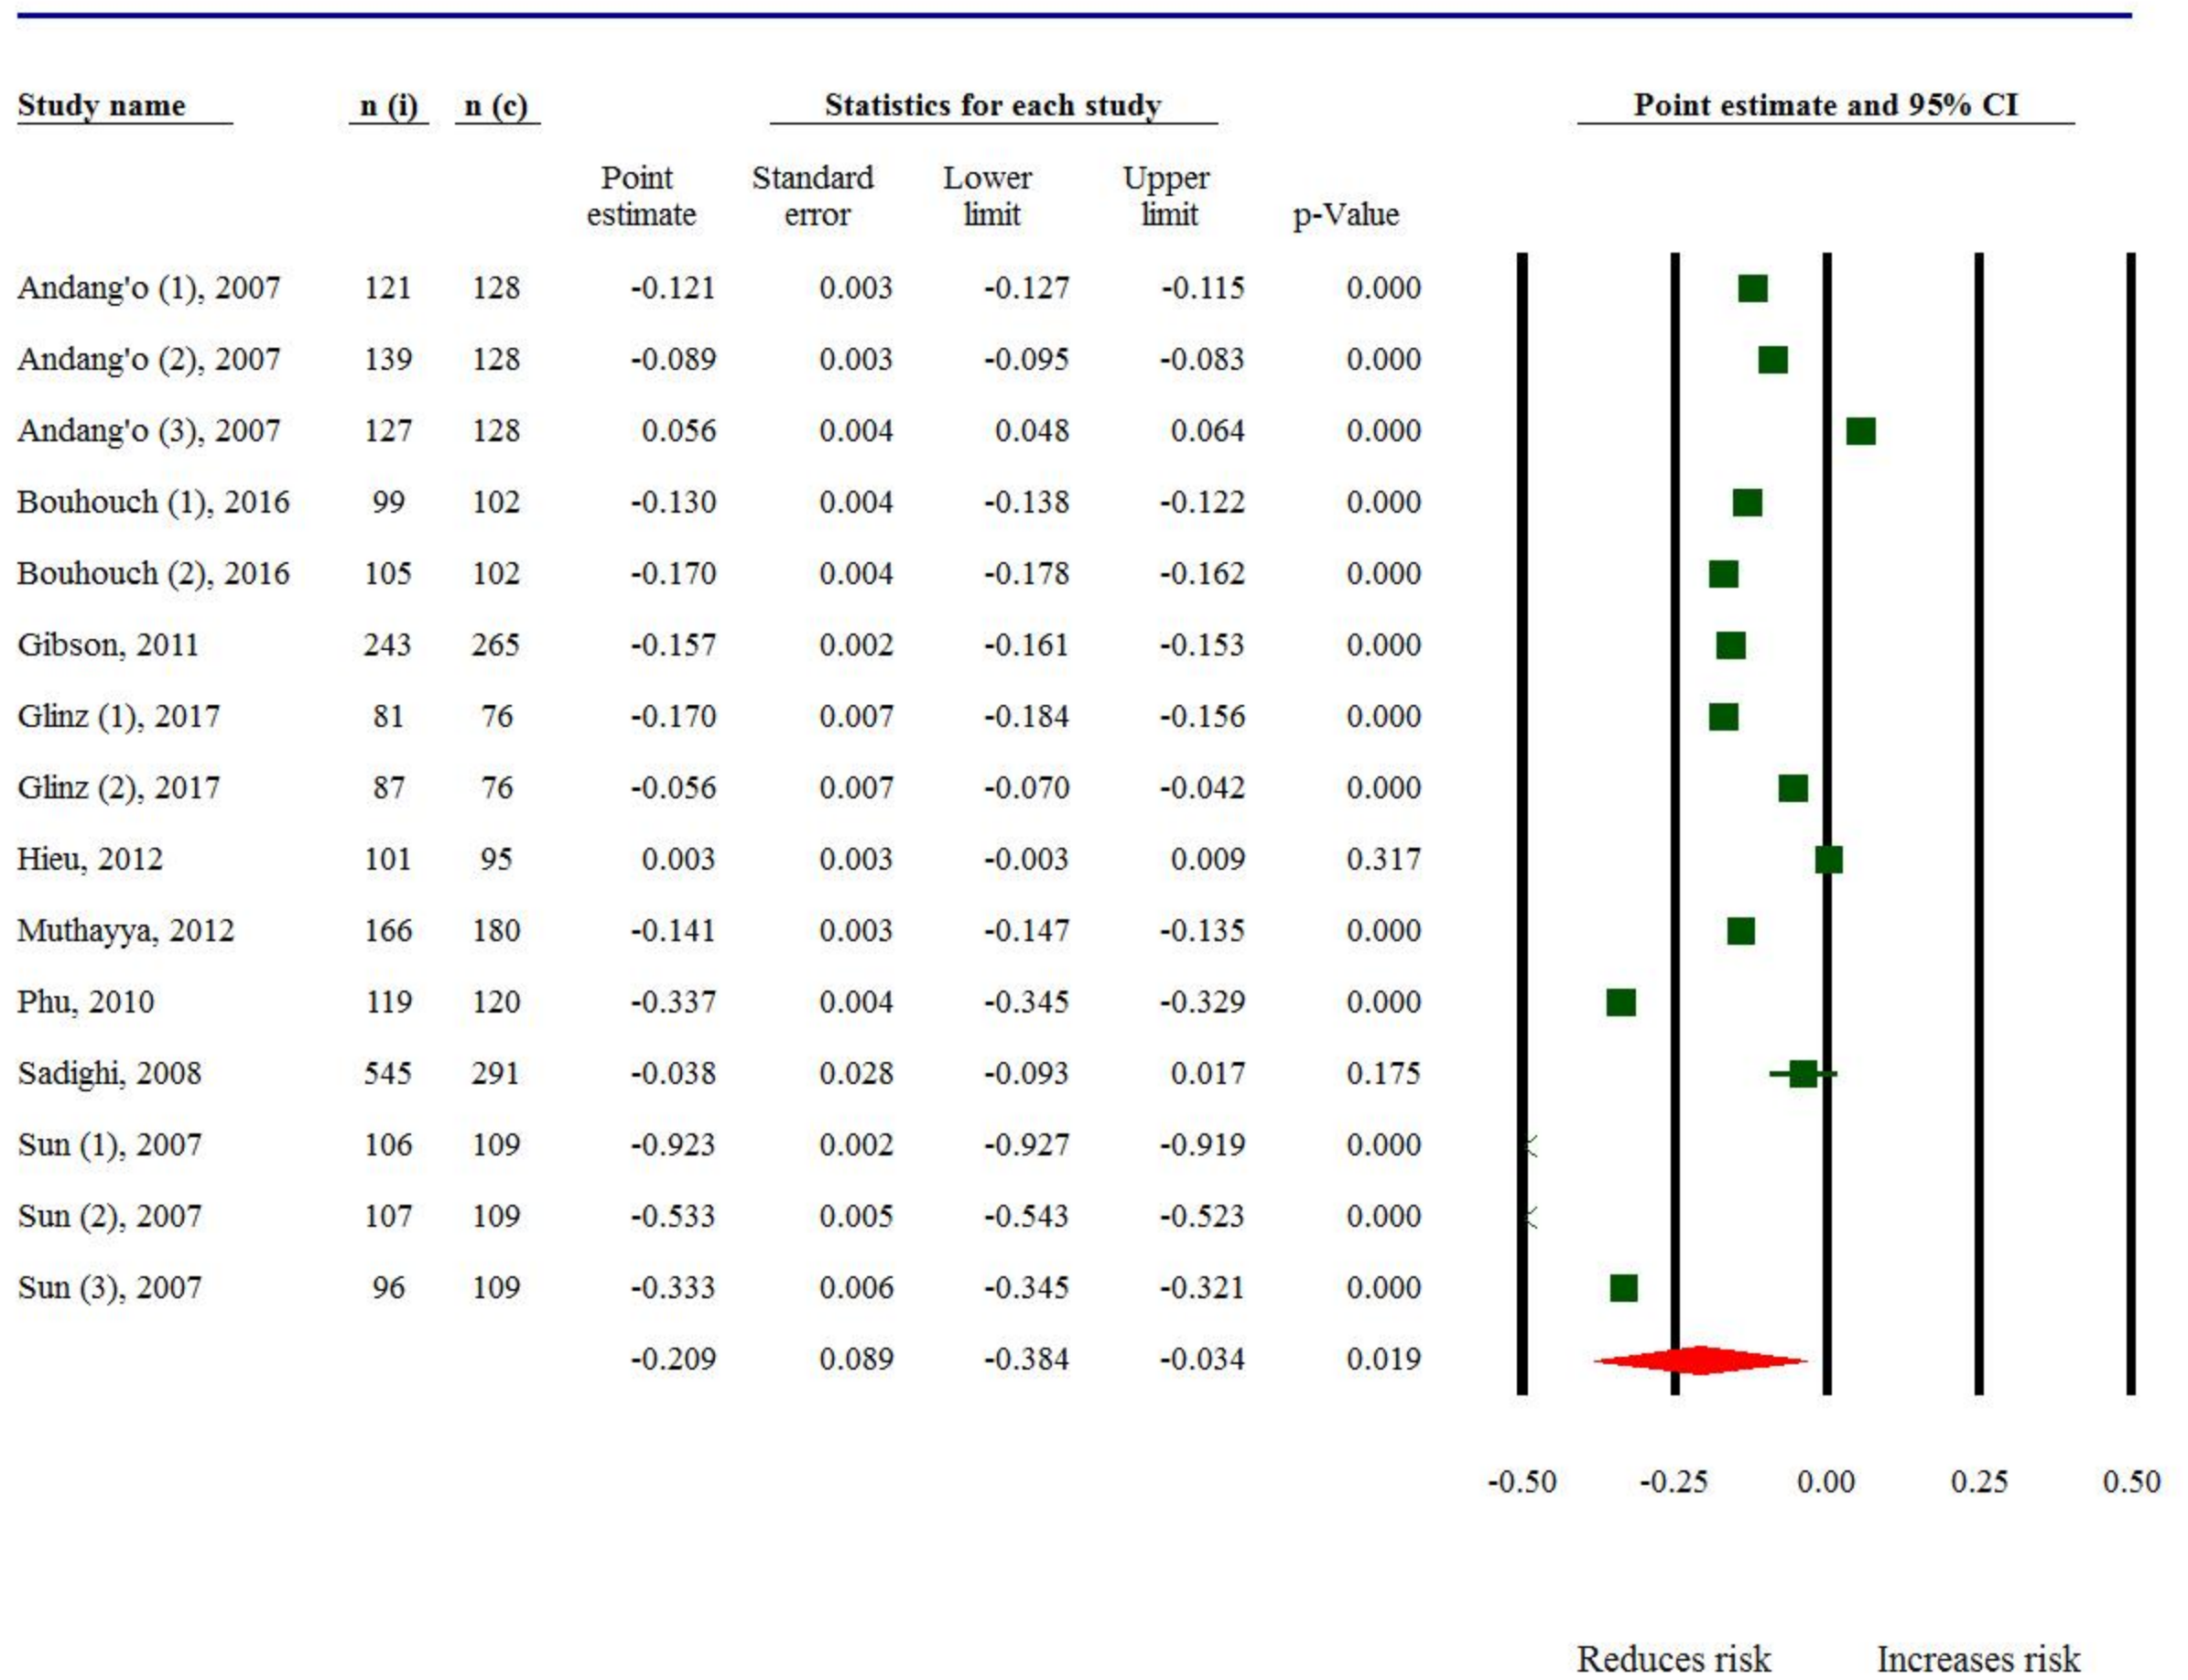

Fig. S10 Forest plot: effect of iron-fortified flour on the IDA prevalence, controlled trials
